# Supplementary material for: Silver linings of ADHD: a thematic analysis of adults’ positive experiences with living with ADHD
Source: PubMed Central journal article supplement — BMJ Open. 2023 Oct 3;13(10):e072052. doi: 10.1136/bmjopen-2023-072052 (PMC10551976; doi:10.1136/bmjopen-2023-072052), 2023-10-03
Supplement: bmjopen-2023-072052.draft_revisions.pdf [file bmjopen-2023-072052.draft_revisions.pdf]

# BMJ Open

BMJ Open is committed to open peer review. As part of this commitment we make the peer review history of every article we publish publicly available.

When an article is published we post the peer reviewers' comments and the authors' responses online. We also post the versions of the paper that were used during peer review. These are the versions that the peer review comments apply to.

The versions of the paper that follow are the versions that were submitted during the peer review process. They are not the versions of record or the final published versions. They should not be cited or distributed as the published version of this manuscript.

BMJ Open is an open access journal and the full, final, typeset and author-corrected version of record of the manuscript is available on our site with no access controls, subscription charges or pay-per-view fees (<http://bmjopen.bmj.com>).

If you have any questions on BMJ Open's open peer review process please email [info.bmjopen@bmj.com](mailto:info.bmjopen@bmj.com)

# BMJ Open

## The silver lining of ADHD: A thematic analysis of adults' positive experiences with living with ADHD

|                               |                                                                                                                                                                                                                                                                                                                                                                                                                                            |
|-------------------------------|--------------------------------------------------------------------------------------------------------------------------------------------------------------------------------------------------------------------------------------------------------------------------------------------------------------------------------------------------------------------------------------------------------------------------------------------|
| Journal:                      | <i>BMJ Open</i>                                                                                                                                                                                                                                                                                                                                                                                                                            |
| Manuscript ID                 | bmjopen-2023-072052                                                                                                                                                                                                                                                                                                                                                                                                                        |
| Article Type:                 | Original research                                                                                                                                                                                                                                                                                                                                                                                                                          |
| Date Submitted by the Author: | 20-Jan-2023                                                                                                                                                                                                                                                                                                                                                                                                                                |
| Complete List of Authors:     | Nordby, Emilie; Haukeland University Hospital; University of Bergen, Department of Biological and Medical Psychology<br>Guribye, Frode; University of Bergen, Department of Information Science and Media Studies<br>Nordgreen, Tine; Haukeland University Hospital; University of Bergen, Department of Global Public Health and Primary Care<br>Lundervold, Astri; University of Bergen, Department of Biological and Medical Psychology |
| Keywords:                     | MENTAL HEALTH, QUALITATIVE RESEARCH, Adult psychiatry < PSYCHIATRY                                                                                                                                                                                                                                                                                                                                                                         |
|                               |                                                                                                                                                                                                                                                                                                                                                                                                                                            |

SCHOLARONE™  
Manuscripts

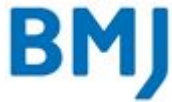

I, the Submitting Author has the right to grant and does grant on behalf of all authors of the Work (as defined in the below author licence), an exclusive licence and/or a non-exclusive licence for contributions from authors who are: i) UK Crown employees; ii) where BMJ has agreed a CC-BY licence shall apply, and/or iii) in accordance with the terms applicable for US Federal Government officers or employees acting as part of their official duties; on a worldwide, perpetual, irrevocable, royalty-free basis to BMJ Publishing Group Ltd ("BMJ") its licensees and where the relevant Journal is co-owned by BMJ to the co-owners of the Journal, to publish the Work in this journal and any other BMJ products and to exploit all rights, as set out in our [licence](#).

The Submitting Author accepts and understands that any supply made under these terms is made by BMJ to the Submitting Author unless you are acting as an employee on behalf of your employer or a postgraduate student of an affiliated institution which is paying any applicable article publishing charge ("APC") for Open Access articles. Where the Submitting Author wishes to make the Work available on an Open Access basis (and intends to pay the relevant APC), the terms of reuse of such Open Access shall be governed by a Creative Commons licence – details of these licences and which [Creative Commons](#) licence will apply to this Work are set out in our licence referred to above.

Other than as permitted in any relevant BMJ Author's Self Archiving Policies, I confirm this Work has not been accepted for publication elsewhere, is not being considered for publication elsewhere and does not duplicate material already published. I confirm all authors consent to publication of this Work and authorise the granting of this licence.

# The silver lining of ADHD: A thematic analysis of adults'

## positive experiences with living with ADHD

Emilie S Nordby<sup>1, 2\*</sup>; Frode Guribye<sup>3</sup>; Tine Nordgreen<sup>1, 4</sup>; Astri J Lundervold<sup>2</sup>

<sup>1</sup>Division of Psychiatry, Haukeland University Hospital, Bergen, Norway.

<sup>2</sup>Department of Biological and Medical Psychology, Faculty of Psychology, University of Bergen, Bergen, Norway.

<sup>3</sup>Department of Information Science and Media Studies, University of Bergen, Bergen, Norway

<sup>4</sup>Department of Global Public Health and Primary Care, Faculty of Medicine, University of Bergen, Bergen, Norway

\*Corresponding author: Emilie S. Nordby, [emilie.nordby@uib.no](mailto:emilie.nordby@uib.no)

1  
2  
3  
4  
5  
6  
7  
8  
9  
10  
11  
12  
13  
14  
15  
16  
17  
18  
19  
20  
21  
22  
23  
24  
25  
26  
27  
28  
29  
30  
31  
32  
33  
34  
35  
36  
37  
38  
39  
40  
41  
42  
43  
44  
45  
46  
47  
48  
49  
50  
51  
52  
53  
54  
55  
56  
57  
58  
59  
60

### Abstract

**Objective:** To identify and explore positive aspects of having ADHD as reported by adults with the diagnosis.

**Method:** The study included 50 adults with ADHD seeking psychological treatment. The participants took part in trial of a self-guided Internet-delivered intervention. As part of the intervention, the participants were asked to describe positive aspects of having ADHD. The participants' responses were analyzed using thematic analysis.

**Results:** The participants described a variety of positive aspects related to having ADHD. The participants' experiences were conceptualized and thematically organized into four main

1  
2  
3 themes: i) the dual impact of ADHD characteristics; ii) the unconventional mind; iii) the  
4  
5  
6  
7 pursuit of new experiences; and iv) resilience and growth.  
8  
9

10 **Conclusion:** Having ADHD could be experienced as both challenging and beneficial,  
11  
12  
13 depending upon the context and one's socio-cultural environment. The findings give  
14  
15  
16 arguments for putting a stronger emphasis on positive aspects of ADHD, alongside the  
17  
18  
19 challenges, in treatment settings.  
20  
21  
22  
23  
24  
25  
26

27 **Word count:** 5631  
28  
29

30 **Keywords:** ADHD<sub>1</sub>, Adulthood<sub>2</sub>, Strengths<sub>3</sub>, Positive psychology<sub>4</sub>, Thematic analysis<sub>5</sub>  
31  
32  
33  
34  
35  
36  
37  
38  
39  
40  
41  
42  
43  
44  
45  
46  
47  
48  
49  
50  
51  
52  
53  
54  
55  
56

### 57 **Strengths and limitations** 58 59 60

- 1  
2  
3  
4  
5  
6  
7  
8  
9  
10  
11  
12  
13  
14  
15  
16  
17  
18  
19  
20  
21  
22  
23  
24  
25  
26  
27  
28  
29  
30  
31  
32  
33  
34  
35  
36  
37  
38  
39  
40  
41  
42  
43  
44  
45  
46  
47  
48  
49  
50  
51  
52  
53  
54  
55  
56  
57  
58  
59  
60
- The current study is one of few studies that focus on positive aspects of ADHD.
  - With the current study design and analysis, we can only explore the participants' experiences with positive aspects of ADHD, but studies with different study designs are needed to examine the frequency of these positive aspects and their generalizability.
  - The sample is restricted to only include participants who responded to a question regarding positive traits, which was about half of the participants in the clinical trial.
  - The sample included more females than males, which makes the findings less transferable to males.

1  
2  
3  
4  
5  
6  
7  
8  
9  
10  
11  
12  
13  
14  
15  
16  
17  
18  
19  
20  
21  
22  
23  
24  
25  
26  
27  
28  
29  
30  
31  
32  
33  
34  
35  
36  
37  
38  
39  
40  
41  
42  
43  
44  
45  
46  
47  
48  
49  
50  
51  
52  
53  
54  
55  
56  
57  
58  
59  
60

## Introduction

Attention Deficit Hyperactivity Disorder (ADHD) is a neurodevelopmental disorder with a high prevalence rate in childhood [1]. The persistence of impairing symptoms into adulthood is common and reported by up to 90% of childhood cases [2]. Common symptoms of ADHD in adulthood include inattention, restlessness, and impulsivity, but deficits related to emotion regulation and executive functioning are also frequently reported [3-5]. These symptoms are known to interfere with many activities of daily living, and tend to affect functions within occupational, educational, interpersonal and financial domains [3]. Medication is the primary treatment for adults with ADHD, but many ask for additional psychological treatment [6, 7].



1  
2  
3  
4                   Research on ADHD tend to focus on the impairments and negative outcomes  
5  
6  
7 associated with the diagnosis. While individuals with ADHD have more challenges than  
8  
9  
10 individuals without ADHD, the burden of living with ADHD may increase by portraying a  
11  
12  
13 primarily deficit-oriented view of having the diagnosis. For instance, it is well-known that  
14  
15  
16 individuals with ADHD are prone to experience public stigma, prejudice and criticism on the  
17  
18  
19 basis of their diagnosis, which can negatively impact self-esteem, self-efficacy and well-  
20  
21  
22 being [8, 9]. Moreover, a deficit-oriented view of ADHD may neglect the strengths  
23  
24  
25 associated with the diagnosis. Another approach would be to foster a more ability-oriented  
26  
27  
28 view of ADHD, where one seeks to emphasize the person's resources, abilities and coping  
29  
30  
31 skills [10].  
32  
33  
34

35  
36  
37                   The majority of the available treatment interventions for adults with ADHD still tend  
38  
39  
40 to have a more deficit-oriented focus, where most studies define successful treatment as  
41  
42  
43 reduction in ADHD symptoms [11]. Among the 23 studies on Cognitive behavioral therapy  
44  
45  
46 (CBT) for adults with ADHD presented in a recent systematic review, we were only able to  
47  
48  
49 identify one study that included an intervention with an explicit focus on strengths related to  
50  
51  
52 ADHD [12, 13]. The aforementioned intervention was found to improve knowledge about  
53  
54  
55 ADHD and life satisfaction among the participants and their significant others [12]. As such,  
56  
57  
58  
59  
60

1  
2  
3  
4 this study supports that incorporation of a strength-based focus in psychological treatment for  
5  
6  
7 adults with ADHD may have beneficial effects. Other studies show that adults with ADHD  
8  
9  
10 experience public health care as too deficit- and symptom-centered [14]. As such, some  
11  
12  
13 adults with ADHD seek alternative treatments that are perceived as more strength-based,  
14  
15  
16 even if they are not reimbursed by healthcare insurances [14]. Given that people are willing  
17  
18  
19 to pay out-of-pocket for these treatments, it may indicate that the current treatment options do  
20  
21  
22 not entirely meet the needs of adults with ADHD [14].  
23  
24

25  
26  
27 The scientific literature on the strengths associated with ADHD is still scarce [15].  
28

29  
30 There are a few qualitative studies that have found that adults with ADHD attribute several  
31  
32  
33 positive aspects to the diagnosis, such as energy, drive, creativity, hyperfocus, agreeableness,  
34  
35  
36 empathy, courage, curiosity, and resilience [16-18]. A review of the link between creativity  
37  
38  
39 and ADHD have also shown that creative abilities and achievements were high among  
40  
41  
42 individuals with both clinical and subclinical symptoms of ADHD [15]. In line with this,  
43  
44  
45 some studies have also found ADHD to be associated with entrepreneurial intentions and  
46  
47  
48 initiation of entrepreneurial actions [19, 20]. As such, these studies highlight that despite the  
49  
50  
51 well-known challenges associated with ADHD, there are also several strengths that may be  
52  
53  
54 linked to having the diagnosis.  
55  
56  
57  
58  
59  
60

1  
2  
3  
4 The aim of the current study was to identify and explore positive aspects of having  
5  
6  
7 ADHD as reported by adults with ADHD seeking psychological treatment. We also seek to  
8  
9  
10 shed light upon how these aspects of the diagnosis can be utilized in future treatment  
11  
12  
13 interventions for adults with ADHD. There is a lack of previous studies examining the  
14  
15  
16 positive aspects of ADHD, and thus the findings from the current study may contribute to fill  
17  
18  
19 a gap in the literature. A more dual focus on both the strengths and challenges related to  
20  
21  
22 ADHD may further have a countereffect on the public stigmatization associated with the  
23  
24  
25 diagnosis and help to empower individuals with the diagnosis.  
26  
27  
28  
29  
30  
31  
32  
33

## 34 Method

### 37 Study design

38  
39  
40 The current study is a qualitative investigation including written responses from adults with  
41  
42  
43 ADHD to an open-ended question about self-perceived positive aspects of having ADHD.  
44  
45  
46

47 The empirical material was analyzed using thematic analysis with hermeneutic  
48  
49  
50 phenomenological framework [21, 22].  
51  
52  
53

### 54 Study context

55  
56  
57  
58  
59  
60

1  
2  
3  
4 The data used in the current study originate from a larger clinical trial of a self-guided  
5  
6  
7 Internet-delivered intervention for adults with ADHD ([23]. The clinical trial was a multiple  
8  
9  
10 randomized controlled trial including 109 adults with ADHD aiming to examine whether  
11  
12  
13 reminders would improve adherence to the intervention. The intervention was accessed  
14  
15  
16 online and included seven modules targeting common themes and challenges related to  
17  
18  
19 ADHD. The first module was an introduction module, whereas the second to sixth module  
20  
21  
22 focused on inattention, inhibitory control, emotion dysregulation, planning and organization,  
23  
24  
25 and self-acceptance, and included instructions to various coping strategies. The seventh and  
26  
27  
28 last module was a summary module of the entire program (see [24] for a more detailed  
29  
30  
31 description of the intervention). Most of the participants who answered the post-intervention  
32  
33  
34 assessment reported that they were satisfied with the intervention. The participants received a  
35  
36  
37 gift card of 400 NOK (38 EUR) for their participation in the clinical trial, regardless of  
38  
39  
40 whether they answered the question assessing positive aspects of ADHD.  
41  
42  
43  
44  
45  
46

47 The original study protocol planned to use both qualitative and quantitative methods  
48  
49  
50 for data analysis, but it was not planned to examine positive aspects of ADHD. However,  
51  
52  
53 when reviewing the data, we were struck by its richness and the number of answers given to  
54  
55  
56  
57  
58  
59  
60

1  
2  
3  
4 this open and non-obligatory question on positive aspects of ADHD, which inspired us to  
5  
6  
7 conduct a more in-depth examination of the empirical material.  
8  
9

### 10 **Recruitment and inclusion criteria**

11  
12  
13 Participants who were eligible to participate in the clinical trial were adults with ADHD  
14  
15  
16 living in Norway. The participants were recruited through the Norwegian ADHD patient  
17  
18  
19 association, via the associations' Facebook page and email listings. Their members received a  
20  
21  
22 link to our project website, where they could read about the study and complete a pre-  
23  
24  
25 screening survey to confirm their eligibility. The participants who were eligible were invited  
26  
27  
28 to a telephone screening interview performed by a clinical psychologist or a psychiatric  
29  
30  
31 nurse. In the telephone screening, the participants had to confirm a diagnosis of ADHD, give  
32  
33  
34 information about the name of the diagnosing physician, the diagnosing institution, and the  
35  
36  
37 date of diagnostic decision. They were also asked about current ADHD symptoms, everyday  
38  
39  
40 functioning, and treatment. Comorbid psychiatric disorders, including depression, suicidality,  
41  
42  
43 psychosis, bipolar disorder, and substance abuse, were assessed through the diagnostic  
44  
45  
46 interview MINI [25] as part of the telephone screening. This was done to ensure that  
47  
48  
49 participants in need of other treatment interventions were not included in the trial. Moreover,  
50  
51  
52  
53  
54  
55  
56  
57 all participants had to give their national identity number, which was used to confirm their  
58  
59  
60

1  
2  
3  
4 identity and secure safe login to the online intervention portal. Following inclusion, the  
5  
6  
7 participants gave their informed consent to participate and completed the pre-intervention  
8  
9  
10 assessment, including the Adult ADHD Self-Report Scale (ASRS), used to assess core  
11  
12  
13 ADHD symptoms.

14  
15  
16  
17 The inclusion criteria for the clinical trial were: (a) age 18 years or older; (b) a  
18  
19  
20 diagnosis of ADHD; (c) access to a computer or smartphone with Internet access, (d) the  
21  
22  
23 ability to read and write the Norwegian language. The exclusion criteria were: (a) severe  
24  
25  
26 mental illness, such as major depression, suicidality, bipolar disorder, psychosis, or substance  
27  
28  
29 abuse disorder; (b) currently participating in another psychological treatment. All participants  
30  
31  
32 who responded to the question assessing positive aspects of ADHD were included in the  
33  
34  
35 current study.  
36  
37  
38  
39

#### 40 **Data collection**

41  
42  
43 The data was collected between June and October 2020. As a part of the sixth module of the  
44  
45  
46 intervention, the participants were asked to respond to the following question: “What do you  
47  
48  
49 experience as positive aspects of having ADHD?”. The participants were further given the  
50  
51  
52 following guiding questions that could help them write their response: a) is there any positive  
53  
54  
55 aspects related to having ADHD? b) has ADHD given you any useful knowledge or  
56  
57  
58  
59  
60

1  
2  
3  
4 experiences? c) has ADHD helped you get in contact with someone you appreciate? The  
5  
6  
7 module page also gave some examples of positive characteristics that adults with ADHD may  
8  
9  
10 experience, such as being creative, accepting, fun, active, explorative, spontaneous, and open-  
11  
12  
13 minded. Considering that the question and their answers were text-based without the  
14  
15  
16 opportunity to ask follow-up questions, we found it necessary to include those examples to  
17  
18  
19 make sure that the participants understood the task. The participant could give their response  
20  
21  
22 in an open-text field on the module page. The mean number of words in the participants  
23  
24  
25 responses was 72.5 words, ranging from 1 to 261 words. There were no instructions on  
26  
27  
28 number of words or formatting and the question was not obligatory to answer to continue  
29  
30  
31 with the module or the intervention. The module which included the question on positive  
32  
33  
34 aspects, was named “acceptance” and it had an overall focus on self-acceptance and self-  
35  
36  
37 compassion, i.e., accepting what you cannot change and being kind to yourself. The module  
38  
39  
40 included psychoeducation, videos, tasks, as well as text and audio instructions to acceptance-  
41  
42  
43 and self-compassion strategies.  
44  
45  
46  
47  
48  
49

## 50 **Data analysis**

51  
52  
53  
54 The data were analyzed using thematic analysis, employing a hermeneutic  
55  
56  
57 phenomenological framework. Thematic analysis is a well-known qualitative method for  
58  
59  
60

1  
2  
3  
4 identifying and analyzing themes or patterns across the data [21]. Unlike some other methods  
5  
6  
7 for qualitative data analysis, thematic analysis does not have a pre-existing theoretical  
8  
9  
10 framework and it can therefore be applied within different frameworks. In line with the  
11  
12  
13 framework we have chosen, we acknowledge that the analytic work is an interpretative and  
14  
15  
16 inherently subjective activity. We have therefore strived to be reflexive by having a  
17  
18  
19 continuous awareness of our pre-understanding and presumptions throughout the research  
20  
21  
22 process. To ensure credibility, we have carefully followed the guidelines prescribed for  
23  
24  
25 thematic analysis. The thematic analysis followed the six phases described by Braun and  
26  
27  
28 Clarke (2006): 1. familiarization with data; 2. generation of codes; 3. search for themes; 4.  
29  
30  
31 reviewing themes; 5. finalize and naming of themes, and 6. producing the report.  
32  
33  
34  
35  
36

37 Following these steps, the first author began the analytic work by reading through the  
38  
39  
40 data material and taking notes. This included transferring the data material from the online  
41  
42  
43 intervention platform to the research server and reading carefully through each of participants  
44  
45  
46 responses while taking notes on preliminary thoughts and ideas. As a next step, the first  
47  
48  
49 author generated codes in line with the analytic focus of the study: “what do adults with  
50  
51  
52 ADHD experience as positive aspects with the diagnosis”. To safeguard interpretive  
53  
54  
55 credibility, the coding was conducted in a “low-inference” manner, where the codes was  
56  
57  
58  
59  
60



1  
2  
3  
4 phrased closely to the participants original accounts. The data material was coded using  
5  
6  
7 NVivo software [26]. Following the coding, the first author created a visual map where the  
8  
9  
10 codes that shared similarities were grouped together (See Figure 1). The creation of the visual  
11  
12  
13 map was intended to provide an overview of the codes and to obtain preliminary ideas  
14  
15  
16 regarding categories and themes.  
17  
18

19  
20 All authors were then given an overview of the codes. The first author also presented the  
21  
22  
23 codes with illustrative examples of excerpts from the data to the second author to discuss how  
24  
25  
26 the quotes were interpreted. The first and second author continued with the third step in the  
27  
28  
29 analysis, namely searching for themes. The initial search for themes resulted in a thematic  
30  
31  
32 structure of ten themes. All authors were given an overview of these ten initial themes to  
33  
34  
35 provide their input and feedback. As a fourth step, the thematic structure was reviewed in  
36  
37  
38 more detail by the first and second author. In this analysis, it became clear that certain themes  
39  
40  
41 shared some commonalities, for instance the initial themes “high energy” and “hyperfocus”  
42  
43  
44 shared overlapping features, and where thus merged into one theme. A new thematic  
45  
46  
47 structure was identified, resulting in four core themes (shown in Table 1). These four themes  
48  
49  
50 were then finalized and named by the first and second author (step 5) and the final report was  
51  
52  
53  
54 produced by all authors (step 6).  
55  
56  
57  
58  
59  
60

(Insert Figure 1)

## Ethics

The intervention study was approved by the Regional Committees for Medical and Health Research. All participants gave their informed consent to participate in the study.

## Patient and Public Involvement

The user-involvement in the larger project (INTROMAT) that the data from the current study originate from, has been extensive. Throughout the 5-year project period, there has been held several user-meetings with adults with ADHD to examine their needs and preferences to psychological interventions for ADHD. Adults with ADHD have also been involved in the development of content and videos to the intervention, as well as evaluating the intervention. In these user-meetings, we did not address the research question or research design for the current study, however, the focus of the current study was informed by previous qualitative studies involving adults with ADHD who have expressed a wish for both research and treatment interventions for ADHD to have a stronger focus on positive aspects related ADHD. The results from the current study will be published on the project website where study participants can be informed. We will also present the findings at meetings for the

1  
2  
3  
4 ADHD patient association, which contributed to the recruitment of participants to the current  
5  
6  
7 study.  
8  
9

## 10 Results

11  
12  
13 Among the 109 participants of the intervention study, 61 accessed the module with the  
14  
15  
16 question on positive aspects to ADHD, and 50 gave their response to this question. The  
17  
18  
19 current sample included 6 men and 44 females with a mean age of 34.5 years, ranging from  
20  
21  
22 23 to 62 years. A total of 37 (72.5%) participants were full-time employed or students and 30  
23  
24  
25 (58.8%) participants had higher education. All but one were diagnosed with ADHD in  
26  
27  
28 adulthood, with 4.8 years being the mean time since receiving the diagnosis. A total of 38  
29  
30  
31 participants (76%) took ADHD medication daily, whereas 4 participants (8%) took ADHD  
32  
33  
34 medication occasionally and 8 participants (16%) did not currently use ADHD medication.  
35  
36  
37 Ritalin ( $n = 20$ ) was the most common prescribed medication followed by Elvanse ( $n = 8$ ),  
38  
39  
40 Aduvanz ( $n = 7$ ), Concerta ( $n = 2$ ) and Attentin ( $n = 2$ ), whereas four participants took a  
41  
42  
43 combination of different medications.  
44  
45  
46  
47  
48  
49

50 The participants reported that they experienced a variety of benefits and advantages  
51  
52  
53 related to ADHD. In the thematic analysis the participants' positive experiences associated  
54  
55  
56  
57 with having ADHD were arranged within four core themes: 1) the dual impact of ADHD  
58  
59  
60

characteristics; 2) the unconventional mind; 3) the pursuit of new experiences; and 4)

resilience and growth (see Table 1).

**Table 1. Core themes**

| Theme                                   | Example of participant quotations                                                                                                                                                                                     |
|-----------------------------------------|-----------------------------------------------------------------------------------------------------------------------------------------------------------------------------------------------------------------------|
| The dual impact of ADHD characteristics | <i>“I have understood that my energy can be used for a lot of good, and that if I use it wrong, it can make things challenging.”</i>                                                                                  |
| The unconventional mind                 | <i>“Creativity, and being able to think outside the norm, is something I really appreciate.”</i>                                                                                                                      |
| The pursuit of new experiences          | <i>“I enjoy trying new things and changes. This is the reason why I have the job that I have”.</i>                                                                                                                    |
| Resilience and growth                   | <i>“The road to my final ADHD diagnosis has been so long and cruel, but I would not have been without all the pain and unbearable years, and all that experience made me know myself in a completely unique way.”</i> |

### **Theme 1: The dual impact of ADHD characteristics**

1  
2  
3 Many of the participants stated that even core characteristics of ADHD, such as hyperactivity  
4  
5  
6 and impulsivity, could be experienced as positive features. Although these core  
7  
8  
9  
10 characteristics could be troublesome, they could also be advantageous and beneficial.  
11  
12

13  
14 High levels of energy and drive was reported to be useful in many contexts, such as  
15  
16 during physical labor, sports, social events, or home renovation. One participant stated: "*I am*  
17  
18 *active. I am often able to do a lot in a short amount of time, and then I get to experience*  
19  
20 *more*". However, although there were positive aspects to having high energy levels, there  
21  
22  
23 could also be downsides: "*I have understood that my energy can be used for a lot of good,*  
24  
25  
26 *and that if I use it wrong, it can make things challenging*". The participants also reported that  
27  
28  
29 they did not tire as easily as others: "*If it is something I really like, I have better endurance*  
30  
31  
32 *than others. I can work on something I enjoy forever without stopping*".  
33  
34  
35  
36  
37  
38  
39

40  
41 The participants also reported spontaneity and risk-taking, which may be categorized  
42  
43 as impulsive traits, as positive aspects associated with ADHD: "*I am spontaneous/impulsive.*  
44  
45  
46 *I can easily just 'jump into it' and that has given me a lot of great experiences*". It was also  
47  
48  
49 mentioned that spontaneity contributed to memorable experiences and learning. However,  
50  
51  
52 some emphasized that spontaneity could be challenging as well: "*I am not really that fond of*  
53  
54  
55  
56  
57  
58  
59  
60

1  
2  
3  
4 *that spontaneous side of myself because I experience losing control, but at the same time it*  
5  
6  
7 *has given me unique friendships, relations and possibilities’.*  
8  
9

10  
11  
12  
13  
14  
15  
16  
17  
18  
19  
20  
21  
22  
23  
24  
25  
26  
27  
28  
29  
30  
31  
32  
33  
34  
35  
36  
37  
38  
39  
40  
41  
42  
43  
44  
45  
46  
47  
48  
49  
50  
51  
52  
53  
54  
55  
56  
57  
58  
59  
60

Hyperfocusing, the ability to have an intense focus on an activity for a longer period of time, was commonly mentioned as an advantage of having ADHD. The participants stated that if they were really interested in a topic, they could maintain focus for a long time without being distracted. Hyperfocus was mentioned to be a contributing factor for completing demanding educational courses, school exams and job assignments. One participant stated that hyperfocusing served as a compensatory strategy: *“I think my ADHD has helped me throughout the exam periods. If it had not been for a kind of hyperfocus, it would not have worked. But then again, I might not have postponed the reading for so long if I did not have ADHD’.* Another participant emphasized that the hyperfocus on useful tasks, such as school or work, for it to be considered as a positive aspect of ADHD. The majority of the participants did not report inattention be positive, however, one participant explicitly mentioned inattention to also have upsides: *“Inattention can be nice when I actually need to change focus, if something happens while I am driving etc. It is also nice because I have observed some amusing conversations and such when I am actually supposed to be doing something else’.*

## Theme 2: The unconventional mind

Many participants reported that they experienced unconventional thinking and behavior as positive aspects of having ADHD. This included characteristics such as being creative, having novel ideas, seeing things from a different perspective than others, and being good at finding solutions. At the same time, it was also emphasized that the social context and expectations present in one's socio-cultural environment could sometimes be an obstacle for utilizing these strengths.

Creativity was emphasized to be a positive aspect of ADHD by many participants:

*“Creativity and being able to think outside the norm is something I really appreciate”.*

Creativity was reported to help one to start new projects and find good solutions at work, as well as make everyday life more exciting. Creativity was also mentioned to be a good quality when it came to parenting as it facilitated playfulness with one's children. Although creativity was viewed as a positive trait by many participants, some emphasized a complexity: *“From my experience in a work-related context, thinking outside the box is not as accepted in all contexts, despite good results”.* With this, the participant underscores that whether a quality is deemed as “good” or “bad” is also dependent on one's environment.

1  
2  
3  
4           There were also participants who described that they could be socially unconventional  
5  
6  
7 and go outside the norm. Some reported that they could be quite straightforward, unafraid,  
8  
9  
10 and uninhibited in social situations: *“I am pretty forward, and I am not afraid to take up space*  
11  
12  
13 *when I need a bit of attention. I know a lot of people and that is probably because I am not*  
14  
15  
16 *scared to say hi to new people”*.

### 20           **Theme 3: The pursuit of new experiences**

21  
22  
23           There were several participants who reported that they experienced adventurousness  
24  
25  
26 and novelty-seeking as positive aspects of ADHD. Being explorative also appeared to be  
27  
28  
29 connected to being both curious and courageous, with some participants describing that they  
30  
31  
32 were curious of the unknown and not afraid to embark on new ventures.  
33  
34  
35

36  
37           Many emphasized that they were curious and enjoyed trying new things and seeking  
38  
39  
40 new experiences. The participants also reported that they enjoyed learning new things: *“I*  
41  
42  
43 *seek new environments where I can learn new things”*. Because they enjoyed learning, they  
44  
45  
46 also acquired knowledge about various topics. In line with this, one participant also  
47  
48  
49 underlined that they would not give up easily when attempting to learn something new: *“I*  
50  
51  
52 *enjoy trying new things, and if I do not get it right the first time, I will examine the possibility*  
53  
54  
55 *of trying a simpler method.”* To enjoy novelty was also reported to be of significance to  
56  
57  
58  
59  
60



1  
2  
3  
4 one's choice of occupation: "*I enjoy trying new things and changes. This is the reason why I*  
5  
6  
7 *have the job that I have*".

8  
9  
10 There were also reports about being courageous and unafraid, which could push one  
11  
12  
13 to seek new experiences: "*I have experienced things that only would have happened by*  
14  
15  
16 *taking a risk*". Moreover, being impulsive could make one more daring: "*I dare more than*  
17  
18  
19 *when I sit down and think about it*".

#### 20 21 22 23 **Theme 4: Resilience and growth**

24  
25  
26 The final theme centers around the participants' experiences of growth and insight  
27  
28  
29 after facing adversity. The participants underscored that although ADHD indeed could be  
30  
31  
32 challenging, especially the process towards being diagnosed with ADHD, coping with these  
33  
34  
35 challenges could also foster resilience and growth.  
36  
37  
38

39  
40 Some of the participants reported to have a better understanding and acceptance for  
41  
42  
43 themselves because of ADHD: "*Being diagnosed with ADHD made me learn a lot about*  
44  
45  
46 *myself. Things I perhaps have been annoyed about, I can now accept and think that it is not*  
47  
48  
49 *'my fault' in a way*". Although the process of getting diagnosed could be tough, it could also  
50  
51  
52 give valuable insight: "*The road to my final ADHD diagnosis has been so long and cruel, but*  
53  
54  
55 *I would not have been without all the pain and unbearable years, and all that experience made*  
56  
57  
58  
59  
60

1  
2  
3  
4 *me know myself in a completely unique way, and I have gotten a very valued quality when it*  
5  
6  
7 *comes to being able to reflect over situations both I and others are in”.*  
8  
9

10  
11 The participants also expressed resilience after coping with previous challenges: “*I*  
12  
13 *am better at handling resistance or challenges now, because I have learned to handle such*  
14  
15 *challenges, it is part of life to have ups and downs”.* Likewise, coping with challenges could  
16  
17 also make one more persistent: “*I have learned to not give up in the face of resistance. Maybe*  
18  
19 *I must take some detours, do things differently than others, find out what works for me and*  
20  
21 *trust myself, but the point is, I can make it if I want to”.*  
22  
23  
24  
25  
26  
27  
28  
29

30  
31 The experience of receiving the diagnosis appeared to be especially important: “*To*  
32  
33 *get the diagnosis was a relief because it gave me an explanation for why I did things I did not*  
34  
35 *understand earlier, such as why I was not able to shut up, but talk without thinking, and why*  
36  
37 *my emotions fluctuate so much, and often without me understanding why. It has given me*  
38  
39 *more understanding and acceptance for myself”.* When the participants’ learned about the  
40  
41 diagnosis, it allowed them to be more kind towards themselves: “*I discovered that I have*  
42  
43 *ADHD in adulthood, so I lived most of my life in the belief that I am like everyone else. I*  
44  
45 *have had high expectations to myself, compared myself to others, and achieved a lot (...)* So  
46  
47  
48  
49  
50  
51  
52  
53  
54  
55  
56  
57  
58  
59  
60

1  
2  
3  
4 *when I found out about my challenges, it all became like a piece of cake. I could with good*  
5  
6  
7 *reasons lower the expectations to myself and finally rest with a clear conscience”.*  
8  
9

10 The participants also reported that they were non-judgmental and accepting of other  
11  
12  
13 people: “*Since I am such a “fool” I don’t judge others for being it*”. The participants also  
14  
15  
16 reported to be more empathic and understanding of others’ point of view. Several participants  
17  
18  
19 had jobs that involved working with people with disabilities, where having ADHD  
20  
21  
22 themselves could help them get a deeper connection with their students or patients: “*I*  
23  
24  
25 *understand a part of the youth on a different level than my colleagues, and I therefore*  
26  
27  
28 *experience that I am able to get a better connection with the students others find it difficult to*  
29  
30  
31 *get close to*”. Another participant also shared similar experiences: “*I notice that I can meet*  
32  
33  
34 *children with ADHD with more understanding, so they feel safe with me quickly, and I know*  
35  
36  
37 *I can help them in challenging situations, or prepare them a bit extra, so that they are able to*  
38  
39  
40  
41 *get through their school day*”.  
42  
43  
44  
45  
46

## 47 Discussion

48  
49  
50 The current study aimed to identify and explore positive aspects of having ADHD  
51  
52  
53 from the perspective of help-seeking adults with the diagnosis. Through the discussion, we  
54  
55  
56  
57 further seek to highlight how positive experiences with the diagnosis can be utilized in  
58  
59  
60

1  
2  
3 treatment interventions. The participants' accounts of positive experiences of having ADHD  
4  
5  
6  
7 could be arranged within the following four themes: 1) the dual impact of ADHD  
8  
9  
10 characteristics; 2) the unconventional mind; 3) the pursuit of new experiences; and 4)  
11  
12  
13 resilience and growth.  
14

15  
16  
17 It seemed that the characteristics of ADHD could be experienced as a double-edged  
18  
19  
20 sword, where the traits could be seen as both challenging and beneficial. The direction of this  
21  
22  
23 relationship further seemed to be dependent upon context and the norms in one's socio-  
24  
25  
26 cultural environment, where certain qualities could be deemed as beneficial in some  
27  
28  
29 situations, but undesirable in other situations. Although one's environment appeared to be  
30  
31  
32 central in the participants' experience of duality related to ADHD characteristics, individual  
33  
34  
35 factors are still important to take into consideration – where one person might find certain  
36  
37  
38 characteristic as beneficial, while another might not have the same perspective. As such,  
39  
40  
41 whether a characteristic is seen as positive or negative is likely depended on a variety of  
42  
43  
44 factors, including individual factors, environmental factors, and the interaction between the  
45  
46  
47 two.  
48  
49  
50  
51

52  
53  
54 From the perspective of the participants, it appeared that even core diagnostic  
55  
56  
57 characteristics of ADHD could be experienced as advantageous. For instance, the high energy  
58  
59  
60

1  
2  
3 associated with hyperactivity could be considered as an advantage in certain social settings  
4  
5  
6  
7 and within sports, whereas hyperfocus could be beneficial during school exams or at work.  
8  
9

10 These findings are in line with results previously reported in other qualitative studies [16, 17].  
11  
12

13 As such, the analytic findings support the notion that some of the characteristics associated  
14  
15  
16 with ADHD can be reframed in a more positive manner. Given the high persistence of  
17  
18  
19 ADHD symptoms into adulthood, helping adults to explore potential advantages of their  
20  
21  
22 symptoms in a treatment-setting could perhaps have favorable outcomes for treatment and  
23  
24  
25 improve life satisfaction [12]  
26  
27  
28  
29

30 On the other hand, the present findings resonate with results from previous studies  
31  
32  
33 showing that ADHD characteristics are associated with problems that affect daily-life  
34  
35  
36 functioning [27-29]. Based on the current reports, it appeared that the participants had to  
37  
38  
39 figure out the ways to make ADHD work for them, with certain traits, such as hyperfocus and  
40  
41  
42 high energy, only being considered beneficial under the right circumstances. This reasoning  
43  
44  
45 can imply that a key step in psychological interventions for ADHD would be to not only  
46  
47  
48 identify the participants' strengths, but also to examine in what contexts these strengths are  
49  
50  
51 useful and potential pitfalls or obstacles for utilizing them.  
52  
53  
54  
55  
56  
57  
58  
59  
60

1  
2  
3  
4 Interestingly, only one of the participants reported inattention to be beneficial. In  
5  
6  
7 relation to this, a study on ADHD and identity among youth with ADHD found that while  
8  
9  
10 several participants experienced positive sides to hyperactivity and impulsivity and integrated  
11  
12  
13 these as part of their identity, inattentive symptoms were not associated with such positive  
14  
15  
16 experiences [30]. The experience of living with inattentive versus hyperactive/impulsive  
17  
18  
19 traits should be an interesting topic for future studies.  
20  
21  
22

23  
24 The findings further show that creativity may be experienced as a positive aspect of  
25  
26  
27 having ADHD. These findings are in line with results from previous studies, which have  
28  
29  
30 associated ADHD symptoms with certain qualities of creativity [31, 32]. Distractibility has  
31  
32  
33 for example been associated with creative achievements [33]. As such, it may be that  
34  
35  
36 distractibility makes one notice more so-called “irrelevant” information in one’s  
37  
38  
39 environment, which later may be helpful in generating more original ideas [33]. Given that  
40  
41  
42 creativity may be a strength of ADHD, it should be possible to take advantage of this quality  
43  
44  
45 in treatment-settings, for example by including more creative tasks in psychosocial  
46  
47  
48 interventions to facilitate engagement and adherence.  
49  
50  
51

52  
53  
54 The current accounts further show that traits such as adventurousness, exploration,  
55  
56  
57 and courage may be seen as strengths of ADHD. Such strengths have also been reported by  
58  
59  
60

1  
2  
3 adults with ADHD in previous studies [17, 34, 35]. In their study, Newark et al. (2016) found  
4  
5  
6  
7 courage to be a resource among adults with ADHD and they further linked this trait to self-  
8  
9  
10 efficacy and self-esteem. The authors further emphasized that courage could be a valuable  
11  
12  
13 skill in therapy, a situation where clients indeed are faced with both challenges and novel  
14  
15  
16  
17 experiences [36].  
18  
19

20  
21         Lastly, it appeared like coping with the challenges associated with ADHD could lead  
22  
23  
24 to resilience and growth for some participants. There were reports about understanding  
25  
26  
27 oneself and others in a more nuanced manner, and successful coping was seen as making  
28  
29  
30 them more fit to cope with future challenges. This is in line with findings from a previous  
31  
32  
33 study including women with ADHD, where the participants identified positive learning from  
34  
35  
36 the challenges they had faced [34]. When people are faced with adversity, they often  
37  
38  
39 underestimate their abilities to cope with the emotional distress and overestimate the intensity  
40  
41  
42 and impact of the particular event [36]. In line with this, some participants seemed to cope  
43  
44  
45  
46 with the challenges related to ADHD in a resilient manner and perhaps even experience  
47  
48  
49 growth when they were going through difficult times. It has further been suggested that  
50  
51  
52  
53 resilience is linked to impulsivity, where impulsive traits may help adults to faster move on  
54  
55  
56  
57 from their problems, which may be useful in therapy-settings [37].  
58  
59  
60

## Implications

The clinical implications of the findings may be to incorporate a stronger focus on strengths and resources in both the assessment and treatment of ADHD in adulthood. There is a consensus within psychotherapy that treatment should not only focus on the absence of symptoms, but also on recovery, coping, well-being, and growth [38]. However, adults with ADHD still report current treatment options to be too deficit-oriented [14]. By putting an emphasis on the full range of experiences related to ADHD, both good and bad, one might be able to offer treatment interventions more in line with the needs of adults with ADHD, which may be favorable for treatment engagement and clinical outcomes. These speculations should indeed provide interesting topics for further studies.

## Strengths and limitations

The current study is one of few studies that focus on positive aspects of ADHD. However, several limitations should be noted. With the current study design and analysis, we can only explore the participants' experiences with positive aspects of ADHD and give a thematic structure of these experiences. However, future studies with different study designs are needed to examine the frequency of these positive aspects and their generalizability. The sample was also restricted to only include participants who responded to a question regarding



1  
2  
3  
4 positive traits, which only was about half of the participants in the clinical trial. The lower  
5  
6  
7 response rate is likely due to the question being asked at the end of the intervention and  
8  
9  
10 several participants had been lost to drop-out and thus never accessed the question on positive  
11  
12  
13 aspects of ADHD. The impact of being participants in a psychological intervention should  
14  
15  
16 also be commented on. For example, it is possible that taking part in the intervention  
17  
18  
19 increased the participants' positive beliefs about themselves and ADHD. The participants did  
20  
21  
22 also receive some examples of positive aspects with ADHD in the intervention which may  
23  
24  
25 have influenced their answers. Still, we found this necessary to include these examples since  
26  
27  
28 the data collection was conducted online without the guidance of researcher. We did also find  
29  
30  
31 it reassuring that the participants' answers went beyond the examples given in the  
32  
33  
34 intervention. The sample did also include more females than males, which makes the findings  
35  
36  
37 less transferable to males since the clinical expression of ADHD is known to vary with  
38  
39  
40 gender [39]. It may also be seen as a limitation that the ADHD diagnosis was based on self-  
41  
42  
43 report. However, all participants were asked to report the date, venue and diagnosing  
44  
45  
46 healthcare professional for the diagnosis, as well as their national identity number. We  
47  
48  
49  
50 therefore have trust in the participants reports. In addition, because participants with ongoing  
51  
52  
53  
54  
55  
56  
57  
58  
59  
60

1  
2  
3  
4 severe mental illness were excluded from the study, the participants are most likely  
5  
6  
7 individuals within the less severe end of the ADHD symptom spectrum.  
8  
9

### 10 **Future directions**

11  
12  
13 The findings from this study needs to be validated by future studies. These studies should not  
14  
15  
16 only investigate characteristics of strengths related to ADHD, but also in what contexts these  
17  
18  
19 strengths are useful and beneficial. Moreover, future studies should investigate the impact of  
20  
21  
22 strength-based treatments on both treatment engagement and clinical outcomes. Future  
23  
24  
25 research should aim for the development of a valid procedure to assess strengths and positive  
26  
27  
28 qualities of adults with ADHD. Moreover, it would also be interesting for future studies to  
29  
30  
31 include other observers' impressions of positive aspects related to ADHD, for instance family  
32  
33  
34 members or clinicians.  
35  
36  
37  
38  
39

### 40 **Conclusion**

41  
42  
43 The aim of the current study was to identify and explore positive aspects of having ADHD  
44  
45  
46 from the perspective of help-seeking adults with the diagnosis. From the perspective of the  
47  
48  
49 participants, the characteristics of ADHD could be both beneficial and challenging,  
50  
51  
52 depending upon the individuals' contextual environment. For clinicians, it may be important  
53  
54  
55 to examine the individual's positive experiences of ADHD, as this should be capitalized upon  
56  
57  
58  
59  
60

1  
2  
3  
4 in treatment. A stronger focus on positive aspects of ADHD in treatment interventions,  
5  
6  
7 alongside the challenges, may also help to contribute to support a more ability-oriented view  
8  
9  
10 of ADHD.  
11  
12

### 13 14 **Declarations**

#### 15 16 17 **Acknowledgements**

18  
19  
20 The authors would like to thank all participants who took part in the study. We would also  
21  
22  
23 like to thank the adults with ADHD who took part in the developmental process of the  
24  
25  
26  
27 intervention.  
28  
29

#### 30 31 **Conflict of interest**

32  
33  
34 The authors declare that they have no conflict of interests  
35  
36

#### 37 38 **Author contributions**

39  
40 ESN contributed to the recruitment of participants for the clinical trial, was responsible for  
41  
42  
43 the thematic analysis, interpretation of the results, and drafting of the manuscript. FG  
44  
45  
46 contributed substantially to the thematic analysis and interpretation of the results, and with  
47  
48  
49 comments and input to different versions of the manuscript. TN was responsible for the  
50  
51  
52 clinical trial (PI) and contributed with comments and input to the manuscript. AJL was  
53  
54  
55 responsible for the idea of the current study and contributed substantially with comments and  
56  
57  
58  
59  
60

1  
2  
3  
4 input on different drafts of the manuscript. All authors have read and accepted the final draft  
5  
6  
7 of the manuscript.  
8  
9

### 10 **Data statement**

11  
12  
13 The data is available from the corresponding author upon reasonable request.  
14  
15

### 16 **Funding**

17  
18  
19 This data used in the current study is from the INTROMAT project, funded by The Research  
20  
21  
22  
23 Council of Norway (grant: 259293). ESN received funding from the Western Norway  
24  
25  
26  
27 Regional Health Authorities (Helse Vest) for her doctoral thesis (grant: F-11016).  
28  
29

### 30 **Ethics approval and consent to participate**

31  
32  
33 The study was received ethical approval from the Regional Committees for Medical and  
34  
35  
36  
37 Health Research, Region West (REK-vest, 90483) in Norway. All participants gave their  
38  
39  
40 informed consent to participate. All methods were carried out in accordance with relevant  
41  
42  
43 regulations and guidelines for research on human subjects and data.  
44  
45  
46  
47  
48  
49  
50  
51  
52  
53  
54  
55  
56  
57  
58  
59  
60

1  
2  
3  
4  
5  
6  
7  
8  
9  
10  
11  
12  
13  
14  
15  
16  
17  
18  
19  
20  
21  
22  
23  
24  
25  
26  
27  
28  
29  
30  
31  
32  
33  
34  
35  
36  
37  
38  
39  
40  
41  
42  
43  
44  
45  
46  
47  
48  
49  
50  
51  
52  
53  
54  
55  
56  
57  
58  
59  
60

For peer review only

## References

1. Willcutt, E.G., *The prevalence of DSM-IV attention-deficit/hyperactivity disorder: a meta-analytic review*. *Neurotherapeutics*, 2012. **9**(3): p. 490-499.
2. Sibley, M.H., L.E. Arnold, J.M. Swanson, L.T. Hechtman, T.M. Kennedy, E. Owens, . . . A. Roy, *Variable patterns of remission from ADHD in the multimodal treatment study of ADHD*. *American Journal of Psychiatry*, 2021. **179**(2): p. 142-151.
3. American Psychiatric Association, *Diagnostic and statistical manual of mental disorders: DSM-5*. 5th ed. 2013, Washington, D.C: American Psychiatric Association.
4. Willcutt, E.G., A.E. Doyle, J.T. Nigg, S.V. Faraone, and B.F. Pennington, *Validity of the executive function theory of attention-deficit/hyperactivity disorder: a meta-analytic review*. *Biological psychiatry*, 2005. **57**(11): p. 1336-1346.
5. Shaw, P., A. Stringaris, J. Nigg, and E. Leibenluft, *Emotion dysregulation in attention deficit hyperactivity disorder*. *American Journal of Psychiatry*, 2014. **171**(3): p. 276-293.
6. Solberg, B.S., J. Haavik, and A. Halmøy, *Health care services for adults with ADHD: Patient satisfaction and the role of psycho-education*. *Journal of attention disorders*, 2019. **23**(1): p. 99-108.

- 1  
2  
3  
4 7. Matheson, L., P. Asherson, I.C.K. Wong, P. Hodgkins, J. Setyawan, R. Sasane, and S.  
5  
6  
7 Clifford, *Adult ADHD patient experiences of impairment, service provision and*  
8  
9  
10 *clinical management in England: a qualitative study*. BMC health services research,  
11  
12  
13 2013. 13(1): p. 1-13.  
14  
15  
16  
17 8. Beaton, D.M., F. Sirois, and E. Milne, *Experiences of criticism in adults with ADHD:*  
18  
19  
20 *A qualitative study*. Plos one, 2022. 17(2): p. e0263366.  
21  
22  
23  
24 9. Mueller, A.K., A. Fuermaier, J. Koerts, and L. Tucha, *Stigma in attention deficit*  
25  
26  
27 *hyperactivity disorder*. ADHD attention deficit and hyperactivity disorders, 2012.  
28  
29  
30 4(3): p. 101-114.  
31  
32  
33  
34 10. Lesch, K.P., *'Shine bright like a diamond!': is research on high-functioning ADHD at*  
35  
36  
37 *last entering the mainstream?* Journal of Child Psychology and Psychiatry, 2018.  
38  
39  
40 59(3): p. 191-192.  
41  
42  
43  
44 11. Epstein, J.N. and M.D. Weiss, *Assessing treatment outcomes in attention-*  
45  
46  
47 *deficit/hyperactivity disorder: a narrative review*. The primary care companion for  
48  
49  
50 CNS disorders, 2012. 14(6).  
51  
52  
53  
54 12. Hirvikoski, T., T. Lindström, J. Carlsson, E. Waaler, J. Jokinen, and S. Bölte,  
55  
56  
57 *Psychoeducational groups for adults with ADHD and their significant others*  
58  
59  
60

- 1  
2  
3  
4 *(PEGASUS): A pragmatic multicenter and randomized controlled trial.* European  
5  
6  
7 Psychiatry, 2017. **44**: p. 141-152.  
8  
9
- 10  
11 13. Fullen, T., S.L. Jones, L.M. Emerson, and M. Adamou, *Psychological Treatments in*  
12  
13 *Adult ADHD: A Systematic Review.* Journal of Psychopathology and Behavioral  
14  
15  
16 Assessment, 2020. **42**: p. 500-518.  
17  
18  
19
- 20  
21 14. Schrevel, S.J., C. Dedding, and J.E. Broerse, *Why do adults with ADHD choose*  
22  
23 *strength-based coaching over public mental health care? A qualitative case study from*  
24  
25  
26 *the Netherlands.* Sage Open, 2016. **6**(3): p. 1-8.  
27  
28  
29
- 30  
31 15. Hoogman, M., M. Stolte, M. Baas, and E. Kroesbergen, *Creativity and ADHD: A*  
32  
33 *review of behavioral studies, the effect of psychostimulants and neural underpinnings.*  
34  
35  
36 Neuroscience & Biobehavioral Reviews, 2020. **119**: p. 66-85.  
37  
38  
39
- 40  
41 16. Mahdi, S., M. Viljoen, R. Massuti, M. Selb, O. Almodayfer, S. Karande, . . . S. Bölte,  
42  
43 *An international qualitative study of ability and disability in ADHD using the WHO-*  
44  
45  
46 *ICF framework.* European child & adolescent psychiatry, 2017. **26**(10): p. 1219-1231.  
47  
48  
49
- 50  
51 17. Sedgwick, J.A., A. Merwood, and P. Asherson, *The positive aspects of attention*  
52  
53  
54 *deficit hyperactivity disorder: a qualitative investigation of successful adults with*  
55  
56  
57  
58  
59  
60



- 1  
2  
3  
4 *ADHD*. *ADHD Attention Deficit and Hyperactivity Disorders*, 2019. **11**(3): p. 241-  
5  
6  
7 253.  
8  
9
- 10 18. Redshaw, R. and L. McCormack, *“Being ADHD”: a Qualitative Study*. *Advances in*  
11  
12  
13 *Neurodevelopmental Disorders*, 2022: p. 1-9.  
14  
15
- 16 19. Lerner, D.A., I. Verheul, and R. Thurik, *Entrepreneurship and attention*  
17  
18  
19 *deficit/hyperactivity disorder: a large-scale study involving the clinical condition of*  
20  
21  
22  
23 *ADHD*. *Small Business Economics*, 2019. **53**(2): p. 381-392.  
24  
25
- 26 20. Wiklund, J., W. Yu, R. Tucker, and L.D. Marino, *ADHD, impulsivity and*  
27  
28  
29 *entrepreneurship*. *Journal of Business Venturing*, 2017. **32**(6): p. 627-656.  
30  
31  
32
- 33 21. Braun, V. and V. Clarke, *Using thematic analysis in psychology*. *Qualitative Research*  
34  
35  
36 *in Psychology*, 2006. **3**(2): p. 77-101.  
37  
38  
39
- 40 22. Binder, P.-E., H. Holgersen, and C. Moltu, *Staying close and reflexive: An*  
41  
42  
43 *explorative and reflexive approach to qualitative research on psychotherapy*. *Nordic*  
44  
45  
46 *Psychology*, 2012. **64**(2): p. 103-117.  
47  
48  
49
- 50 23. Nordby, E.S., R. Gjestad, R.M. Kenter, F. Guribye, S.K. Mukhiya, A.J. Lundervold,  
51  
52  
53  
54 and T. Nordgreen, *The Effect of SMS Reminders on Adherence in a Self-Guided*  
55  
56  
57  
58  
59  
60

- 1  
2  
3  
4 *Internet-Delivered Intervention for Adults With ADHD*. *Frontiers in Digital Health*,  
5  
6  
7 2022. 4.  
8  
9
- 10 24. Kenter, R.M.F., A.J. Lundervold, and T. Nordgreen, *A self-guided Internet-delivered*  
11  
12  
13 *intervention for adults with ADHD: a protocol for a randomized controlled trial*.  
14  
15  
16 Internet Interventions, 2021.  
17  
18
- 19 25. Sheehan, D.V., Y. Lecrubier, K.H. Sheehan, P. Amorim, J. Janavs, E. Weiller, . . .  
20  
21  
22  
23 G.C. Dunbar, *The Mini-International Neuropsychiatric Interview (MINI): the*  
24  
25  
26 *development and validation of a structured diagnostic psychiatric interview for DSM-*  
27  
28  
29 *IV and ICD-10*. *The Journal of clinical psychiatry*, 1998. 59(20): p. 22-33.  
30  
31  
32
- 33 26. QSR, *Nvivo 12 Computer Software*. 2016.  
34  
35
- 36 27. Lefler, E.K., G.M. Sacchetti, and D.I. Del Carlo, *ADHD in college: A qualitative*  
37  
38  
39 *analysis*. *ADHD Attention Deficit and Hyperactivity Disorders*, 2016. 8(2): p. 79-93.  
40  
41  
42
- 43 28. Watters, C., D. Adamis, F. McNicholas, and B. Gavin, *The impact of attention deficit*  
44  
45  
46 *hyperactivity disorder (ADHD) in adulthood: a qualitative study*. *Irish Journal of*  
47  
48  
49  
50  
51 *Psychological Medicine*, 2018. 35(3): p. 173-179.  
52  
53  
54  
55  
56  
57  
58  
59  
60

- 1  
2  
3  
4 29. Michielsen, M., J.T.C. de Kruif, H.C. Comijs, S. van Mierlo, E.J. Semeijn, A.T.  
5  
6  
7 Beekman, . . . J.S. Kooij, *The burden of ADHD in older adults: a qualitative study*.  
8  
9  
10 Journal of Attention Disorders, 2018. **22**(6): p. 591-600.  
11  
12  
13  
14 30. Jones, S. and M. Hesse, *Adolescents with ADHD: Experiences of having an ADHD*  
15  
16  
17 *diagnosis and negotiations of self-image and identity*. Journal of attention disorders,  
18  
19  
20 2018. **22**(1): p. 92-102.  
21  
22  
23  
24 31. Boot, N., B. Nevicka, and M. Baas, *Creativity in ADHD: goal-directed motivation*  
25  
26  
27 *and domain specificity*. Journal of attention disorders, 2020. **24**(13): p. 1857-1866.  
28  
29  
30  
31 32. White, H.A. and P. Shah, *Creative style and achievement in adults with attention-*  
32  
33  
34 *deficit/hyperactivity disorder*. Personality and Individual Differences, 2011. **50**(5): p.  
35  
36  
37 673-677.  
38  
39  
40  
41 33. Zabelina, D., A. Saporta, and M. Beeman, *Flexible or leaky attention in creative*  
42  
43  
44 *people? Distinct patterns of attention for different types of creative thinking*. Memory  
45  
46  
47 & cognition, 2016. **44**(3): p. 488-498.  
48  
49  
50  
51 34. Holthe, M.E.G. and E. Langvik, *The strives, struggles, and successes of women*  
52  
53  
54 *diagnosed with ADHD as adults*. Sage Open, 2017. **7**(1).  
55  
56  
57  
58  
59  
60

- 1  
2  
3  
4 35. Newark, P.E., M. Elsässer, and R.-D. Stieglitz, *Self-esteem, self-efficacy, and*  
5  
6  
7 *resources in adults with ADHD*. Journal of Attention Disorders, 2016. **20**(3): p. 279-  
8  
9  
10 290.  
11  
12  
13  
14 36. Wilson, T.D. and D.T. Gilbert, *Affective forecasting: Knowing what to want*. Current  
15  
16  
17 directions in psychological science, 2005. **14**(3): p. 131-134.  
18  
19  
20  
21 37. Newark, P.E. and R.-D. Stieglitz, *Therapy-relevant factors in adult ADHD from a*  
22  
23  
24 *cognitive behavioural perspective*. ADHD Attention Deficit and Hyperactivity  
25  
26  
27 Disorders, 2010. **2**(2): p. 59-72.  
28  
29  
30  
31 38. Seligman, M.E., *Flourish: A visionary new understanding of happiness and well-*  
32  
33  
34 *being*. 2012: Simon and Schuster.  
35  
36  
37 39. Vildalen, V.U., E.J. Brevik, J. Haavik, and A.J. Lundervold, *Females with ADHD*  
38  
39  
40 *report more severe symptoms than males on the adult ADHD self-report scale*.  
41  
42  
43  
44 Journal of attention disorders, 2019. **23**(9): p. 959-967.  
45  
46  
47  
48  
49  
50  
51  
52  
53  
54  
55  
56  
57  
58  
59  
60

**POSITIVE ASPECTS OF ADHD**

**ENERGY**

- Has a lot of energy
- Gets easily engaged

**ENDURANCE**

- High drive
- Does not give up easily
- Is efficient at tasks

**CREATIVE**

- High creativity
- Good fantasy
- Lots of ideas

**PROBLEM SOLVING**

- Solution oriented
- Sees patterns
- Acts fast when needed
- Ability to switch focus
- Intelligent
- Has become good at planning

**POISITVE EMOTIONS**

- Experiences joy and excitement
- Positive outlook on life
- Spreads joy to others
- Playful
- Sensitive
- Affectionate
- Funny / humor

No positive things with ADHD (-)

**HYPERFOCUS**

- Ability to hyperfocus
- Good at interests
- Has knowledge of many things

**AUTHENTIC**

- Authentic
- Honest
- Does not care what other thinks

**NON-JUDGEMENTAL**

- Accepting towards others
- Not judging others
- Tolerant of other people
- Open to other views

**SOCIAL SKILLS**

- Attentive to people
- Enjoys being social
- Makes new friends easily
- Interesting to talk to
- Strong bond with family members who have ADHD
- Good at handling interpersonal conflicts

Not good for relations (-)

**EMPATHIC**

- Empathic
- Is able put themselves in others' shoes
- Loyal to others
- Sees the best in people
- More understanding for other struggling

**CURIOS**

- Not afraid to ask questions
- High curiosity
- Tries new things
- Explores new environments
- Explorative
- Spontaneous

**COURAGE**

- High on courage
- Fearless
- Is willing to take risks
- Enjoys taking on a challenge

**A DIFFERENT PERSPECTIVE**

- New insight because of diagnosis
- Painful experience that gives you new insight
- See more sides to things
- A different perspective on things
- Critical to doxa

1  
2  
3  
4  
5  
6  
7  
8  
9  
10  
11  
12  
13  
14  
15  
16  
17  
18  
19  
20  
21  
22  
23  
24  
25  
26  
27  
28  
29  
30  
31  
32  
33  
34  
35  
36  
37  
38  
39  
40  
41

# BMJ Open

## The silver lining of ADHD: A thematic analysis of adults' positive experiences with living with ADHD

|                                 |                                                                                                                                                                                                                                                                                                                                                                                                                                            |
|---------------------------------|--------------------------------------------------------------------------------------------------------------------------------------------------------------------------------------------------------------------------------------------------------------------------------------------------------------------------------------------------------------------------------------------------------------------------------------------|
| Journal:                        | <i>BMJ Open</i>                                                                                                                                                                                                                                                                                                                                                                                                                            |
| Manuscript ID                   | bmjopen-2023-072052.R1                                                                                                                                                                                                                                                                                                                                                                                                                     |
| Article Type:                   | Original research                                                                                                                                                                                                                                                                                                                                                                                                                          |
| Date Submitted by the Author:   | 24-Aug-2023                                                                                                                                                                                                                                                                                                                                                                                                                                |
| Complete List of Authors:       | Nordby, Emilie; Haukeland University Hospital; University of Bergen, Department of Biological and Medical Psychology<br>Guribye, Frode; University of Bergen, Department of Information Science and Media Studies<br>Nordgreen, Tine; Haukeland University Hospital; University of Bergen, Department of Global Public Health and Primary Care<br>Lundervold, Astri; University of Bergen, Department of Biological and Medical Psychology |
| <b>Primary Subject Heading</b>: | Mental health                                                                                                                                                                                                                                                                                                                                                                                                                              |
| Secondary Subject Heading:      | Qualitative research                                                                                                                                                                                                                                                                                                                                                                                                                       |
| Keywords:                       | MENTAL HEALTH, QUALITATIVE RESEARCH, Adult psychiatry < PSYCHIATRY                                                                                                                                                                                                                                                                                                                                                                         |
|                                 |                                                                                                                                                                                                                                                                                                                                                                                                                                            |

SCHOLARONE™  
Manuscripts



I, the Submitting Author has the right to grant and does grant on behalf of all authors of the Work (as defined in the below author licence), an exclusive licence and/or a non-exclusive licence for contributions from authors who are: i) UK Crown employees; ii) where BMJ has agreed a CC-BY licence shall apply, and/or iii) in accordance with the terms applicable for US Federal Government officers or employees acting as part of their official duties; on a worldwide, perpetual, irrevocable, royalty-free basis to BMJ Publishing Group Ltd ("BMJ") its licensees and where the relevant Journal is co-owned by BMJ to the co-owners of the Journal, to publish the Work in this journal and any other BMJ products and to exploit all rights, as set out in our [licence](#).

The Submitting Author accepts and understands that any supply made under these terms is made by BMJ to the Submitting Author unless you are acting as an employee on behalf of your employer or a postgraduate student of an affiliated institution which is paying any applicable article publishing charge ("APC") for Open Access articles. Where the Submitting Author wishes to make the Work available on an Open Access basis (and intends to pay the relevant APC), the terms of reuse of such Open Access shall be governed by a Creative Commons licence – details of these licences and which [Creative Commons](#) licence will apply to this Work are set out in our licence referred to above.

Other than as permitted in any relevant BMJ Author's Self Archiving Policies, I confirm this Work has not been accepted for publication elsewhere, is not being considered for publication elsewhere and does not duplicate material already published. I confirm all authors consent to publication of this Work and authorise the granting of this licence.

# The silver lining of ADHD: A thematic analysis of adults'

## positive experiences with living with ADHD

Emilie S Nordby<sup>1, 2\*</sup>; Frode Guribye<sup>3</sup>; Tine Nordgreen<sup>1,4</sup>; Astri J Lundervold<sup>2</sup>

<sup>1</sup>Division of Psychiatry, Haukeland University Hospital, Bergen, Norway.

<sup>2</sup>Department of Biological and Medical Psychology, Faculty of Psychology, University of Bergen, Bergen, Norway.

<sup>3</sup>Department of Information Science and Media Studies, University of Bergen, Bergen, Norway

<sup>4</sup>Department of Global Public Health and Primary Care, Faculty of Medicine, University of Bergen, Bergen, Norway

\*Corresponding author: Emilie S. Nordby, [emilie.nordby@uib.no](mailto:emilie.nordby@uib.no)



1  
2  
3  
4  
5  
6  
7  
8  
9  
10  
11  
12  
13  
14  
15  
16  
17  
18  
19  
20  
21  
22  
23  
24  
25  
26  
27  
28  
29  
30  
31  
32  
33  
34  
35  
36  
37  
38  
39  
40  
41  
42  
43  
44  
45  
46  
47  
48  
49  
50  
51  
52  
53  
54  
55  
56  
57  
58  
59  
60

## Abstract

**Objectives:** To identify and explore positive aspects of ADHD as reported by adults with the diagnosis.

**Design:** The current study used a qualitative survey design including the written responses to an open-ended question on positive aspects of ADHD. The participants' responses were analyzed using thematic analysis.

**Setting:** The participants took part in trial of a self-guided Internet-delivered intervention in Norway. As part of the intervention, the participants were asked to describe positive aspects of having ADHD.

**Participants:** The study included 50 help-seeking adults with an ADHD diagnosis.

1  
2  
3  
4 **Results:** The participants described a variety of positive aspects related to having ADHD. The  
5  
6  
7 participants' experiences were conceptualized and thematically organized into four main  
8  
9  
10 themes: i) the dual impact of ADHD characteristics; ii) the unconventional mind; iii) the  
11  
12  
13 pursuit of new experiences; and iv) resilience and growth.  
14  
15  
16

17 **Conclusions:** Having ADHD was experienced as both challenging and beneficial, depending  
18  
19  
20 upon the context and one's socio-cultural environment. The findings provide arguments for  
21  
22  
23 putting a stronger emphasis on positive aspects of ADHD, alongside the challenges, in  
24  
25  
26  
27 treatment settings.  
28  
29  
30  
31  
32

33 **Word count:** 6710  
34  
35  
36

37 **Keywords:** ADHD<sub>1</sub>, Adulthood<sub>2</sub>, Strengths<sub>3</sub>, Positive psychology<sub>4</sub>, Thematic analysis<sub>5</sub>  
38  
39  
40  
41  
42  
43  
44  
45  
46  
47  
48  
49  
50  
51  
52  
53

#### 54 **Strengths and limitations**

55  
56

- 57 • The current study is one of few studies that focus on positive aspects of ADHD.  
58  
59  
60

- 1  
2  
3  
4  
5  
6  
7  
8  
9  
10  
11  
12  
13  
14  
15  
16  
17  
18  
19  
20  
21  
22  
23  
24  
25  
26  
27  
28  
29  
30  
31  
32  
33  
34  
35  
36  
37  
38  
39  
40  
41  
42  
43  
44  
45  
46  
47  
48  
49  
50  
51  
52  
53  
54  
55  
56  
57  
58  
59  
60
- With the current study design, we could only explore the participants' experiences with positive aspects of ADHD. Future studies are needed to examine the generalizability of these positive aspects.
  - The large majority of the sample were females, which makes the findings less transferable to males.
  - The sample is restricted to including participants who responded to a question regarding positive traits.

1  
2  
3  
4  
5  
6  
7  
8  
9  
10  
11  
12  
13  
14  
15  
16  
17  
18  
19  
20  
21  
22  
23  
24  
25  
26  
27  
28  
29  
30  
31  
32  
33  
34  
35  
36  
37  
38  
39  
40  
41  
42  
43  
44  
45  
46  
47  
48  
49  
50  
51  
52  
53  
54  
55  
56  
57  
58  
59  
60

## Introduction

Attention Deficit Hyperactivity Disorder (ADHD) is a neurodevelopmental disorder with prevalence estimates of approximately 5% of children and 2.6% of adults [1, 2]. Recently, the number of individuals being diagnosed with ADHD in adulthood has increased, with women being at particular risk for receiving a diagnosis later in life [3, 4]. The diagnosis of ADHD is characterized by three cardinal symptoms: inattention, hyperactivity, and impulsivity [5].

Adults with ADHD also tend to face additional challenges related to emotion dysregulation, poor working memory, planning and organization skills [6, 7]. These symptoms and challenges are known to interfere with many activities of daily living, with impact on occupational, educational, interpersonal and financial domains [5]. Pharmacological

1  
2  
3  
4 treatment is the primary treatment for adults with ADHD, but many seek additional  
5  
6  
7 psychological treatment [8, 9].  
8  
9

10           Research on ADHD has traditionally focused on the impairments and negative  
11  
12  
13 outcomes associated with the diagnosis. When portraying a primarily deficit-oriented view on  
14  
15  
16 the diagnosis, it may add to the burden of living with ADHD. For instance, it is well-known  
17  
18 that individuals with ADHD are prone to experience public stigma, prejudice and criticism  
19  
20 based on their diagnosis, which can negatively impact self-esteem, self-efficacy and well-  
21  
22 being [10, 11]. Moreover, a deficit-oriented view of ADHD may overlook strengths of  
23  
24 persons with the diagnosis. An alternative approach would be to adopt a more ability-oriented  
25  
26 view of ADHD, emphasizing the individuals' resources, abilities and skills [12]. This  
27  
28 perspective aligns with beliefs of the neurodiversity movement, which has gained  
29  
30 considerable recognition with the rise of social media platforms like TikTok and Instagram  
31  
32 [13]. Unlike the biological-medical perspective of ADHD, the neurodiversity movement  
33  
34 advocates that ADHD and similar conditions should be denoted as neurological differences  
35  
36 rather than being conceptualized as deficits [14, 15]. From this perspective, the neurological  
37  
38 differences associated with ADHD are considered to be of societal benefit as they contribute  
39  
40 to valuable diversity within the population [15].  
41  
42  
43  
44  
45  
46  
47  
48  
49  
50  
51  
52  
53  
54  
55  
56  
57  
58  
59  
60

1  
2  
3  
4 The majority of available studies on psychological treatment interventions for adults  
5  
6  
7 with ADHD also tend to have a deficit-oriented focus, with most studies defining successful  
8  
9  
10 treatment as reduction in core ADHD symptoms [16]. Among 23 studies on Cognitive  
11  
12  
13 behavioral therapy (CBT) for adults with ADHD included in a recent systematic review, only  
14  
15  
16 one study examined an intervention with an explicit focus on strengths associated with  
17  
18  
19 having ADHD [17, 18]. This particular intervention was found to improve the participants'  
20  
21  
22 knowledge about ADHD and life satisfaction, giving support for incorporation of a strength-  
23  
24  
25 based approach in psychological treatment for adults with ADHD [17]. Findings from  
26  
27  
28 qualitative research further indicate that public mental health care is perceived as too deficit-  
29  
30  
31 and symptom-centered by adults with ADHD, leading some to seek alternative treatments  
32  
33  
34 that are perceived as more strength-based, even if not reimbursed by healthcare insurances  
35  
36  
37 [19]. The willingness to pay out-of-pocket for these treatments could suggest that the current  
38  
39  
40 treatment options do not fully meet the needs of adults with ADHD [19].  
41  
42  
43  
44  
45  
46

47 Taken together, the scientific literature on the strengths associated with ADHD is still  
48  
49  
50 scarce [20]. Moreover, most studies on ADHD have included clinical samples of children,  
51  
52  
53 and less research has focused on adults' experiences with the diagnosis. However, there are a  
54  
55  
56 few recent qualitative studies that have explored the positive experiences of adults with  
57  
58  
59  
60

1  
2  
3 ADHD. A review on qualitative research examining the lived experience of adults with  
4  
5  
6  
7 ADHD indicate that certain aspects of ADHD can be experienced as positive [21]. Within  
8  
9  
10 these studies, attributes like energy, creativity, determination, hyperfocus, adventurousness,  
11  
12  
13 curiosity, and resilience were emphasized [22-25]. However, these studies have largely  
14  
15  
16 included small samples of high-functioning adults with ADHD. One exception is the study by  
17  
18  
19 Schippers et al. (2022) which applied both qualitative and quantitative methods to examine  
20  
21  
22 perceived positive characteristics with ADHD in a large sample of 206 adults with ADHD  
23  
24  
25 [26]. Almost all of the participants in the study reported positive aspects related to ADHD,  
26  
27  
28 with core themes being creativity, being dynamic, flexibility, socio-affective skills, and  
29  
30  
31 higher order cognitive skills. There are also a few quantitative studies that have focused on  
32  
33  
34 positive aspects of ADHD, in particular creativity. A review of the link between creativity  
35  
36  
37 and ADHD have also shown that creative abilities and achievements were high among  
38  
39  
40 individuals with both clinical and subclinical symptoms of ADHD [20]. In line with this,  
41  
42  
43 some studies have found ADHD to be associated with entrepreneurial intentions and  
44  
45  
46 initiation of entrepreneurial actions [27, 28]. As such, these studies highlight that despite the  
47  
48  
49 well-known challenges associated with ADHD, there are also several strengths that may be  
50  
51  
52  
53  
54  
55  
56  
57 linked to having the diagnosis.  
58  
59  
60

1  
2  
3  
4 The current study employs a qualitative design to identify and explore positive aspects  
5  
6  
7 of having ADHD. By including a fairly large group of adults with ADHD seeking  
8  
9  
10 psychological help (n = 50), the study aims to shed light upon how these positive aspects of  
11  
12  
13 the diagnosis can be utilized as part of psychological interventions for this group of adults. In  
14  
15  
16 this regard, the current study follows up on findings from previous qualitative studies that  
17  
18  
19 explored positive experiences with having the diagnosis. It also resonates with studies  
20  
21  
22 indicating that adults with ADHD advocate for treatment options that are less deficit and  
23  
24  
25 symptom oriented. We thus believe that investigating into the positive experiences of help-  
26  
27  
28 seeking adults with ADHD would contribute to fill an important gap in the research field. A  
29  
30  
31 two-folded focus on both the strengths and challenges related to ADHD may further have a  
32  
33  
34 countereffect on the public stigmatization associated with the diagnosis and help to empower  
35  
36  
37 individuals with the diagnosis.  
38  
39  
40  
41  
42  
43  
44  
45  
46  
47  
48  
49  
50

## 51 **Method**

### 52 **Study design**

53  
54 The current study is a qualitative investigation including written responses from adults with  
55  
56  
57 ADHD to an open-ended question about self-perceived positive aspects of having ADHD.  
58  
59  
60



1  
2  
3  
4 The empirical material was analyzed using thematic analysis with hermeneutic  
5  
6  
7 phenomenological framework [29, 30].  
8  
9

### 10 **Study context**

11  
12  
13 The data used in the current study originate from a larger clinical trial of a self-guided  
14  
15  
16 Internet-delivered intervention for adults with ADHD ([31]. The clinical trial was a multiple  
17  
18  
19 randomized controlled trial including 109 adults with ADHD aiming to examine whether  
20  
21  
22 SMS reminders would improve treatment adherence (ClinicalTrials.gov NCT04511169). The  
23  
24  
25 self-guided intervention was accessed online and included seven modules targeting common  
26  
27  
28 themes and challenges related to ADHD. The first module was an introduction module,  
29  
30  
31 whereas the second to sixth module focused on inattention, inhibitory control, emotion  
32  
33  
34 dysregulation, planning and organization, and self-acceptance, and included instructions to  
35  
36  
37 various coping strategies. The seventh and last module was a summary module of the entire  
38  
39  
40 program (see [32] for a more detailed description of the intervention). The majority of the  
41  
42  
43 participants who responded to the post-assessment reported to be satisfied with the  
44  
45  
46 intervention. The participants received a gift card of 400 NOK (38 EUR) for their  
47  
48  
49 participation in the clinical trial, regardless of whether they answered the question assessing  
50  
51  
52 positive aspects of ADHD.  
53  
54  
55  
56  
57  
58  
59  
60

1  
2  
3  
4 The original study protocol planned to use both qualitative and quantitative methods  
5  
6  
7 for data analysis, but it was not planned to examine positive aspects of ADHD. However,  
8  
9  
10 when reviewing the data, we were struck by its richness and the number of answers given to  
11  
12  
13 this open and non-obligatory question on positive aspects of ADHD, which inspired us to  
14  
15  
16  
17 conduct a more in-depth examination of the empirical material.  
18  
19

### 20 **Recruitment and inclusion criteria**

21  
22  
23 Participants who were eligible to participate in the clinical trial were adults with ADHD  
24  
25  
26 living in Norway. The participants were recruited through the Norwegian ADHD patient  
27  
28  
29 association, via the associations' Facebook page and email listings. Their members received a  
30  
31  
32 link to our project website, where they could read about the study and complete a pre-  
33  
34  
35 screening survey to confirm their eligibility. The participants who were eligible were invited  
36  
37  
38 to a telephone screening interview performed by a clinical psychologist or a psychiatric  
39  
40  
41 nurse. In the telephone screening, the participants had to confirm a diagnosis of ADHD, give  
42  
43  
44 information about the name of the diagnosing physician, the diagnosing institution, and the  
45  
46  
47 date of diagnostic decision. They were also asked about current ADHD symptoms, everyday  
48  
49  
50 functioning, and treatment. Comorbid psychiatric disorders, including depression, suicidality,  
51  
52  
53 psychosis, bipolar disorder, and substance abuse, were assessed through the diagnostic  
54  
55  
56  
57  
58  
59  
60

1  
2  
3 interview MINI [33] as part of the telephone screening. This was done to ensure that  
4  
5  
6  
7 participants in need of other treatment interventions were not included in the trial. Moreover,  
8  
9  
10 all participants had to give their national identity number, which was used to confirm their  
11  
12  
13 identity and secure safe login to the online intervention portal. Following inclusion, the  
14  
15  
16 participants gave their informed consent to participate and completed the pre-intervention  
17  
18  
19 assessment, including the Adult ADHD Self-Report Scale (ASRS), used to assess core  
20  
21  
22  
23 ADHD symptoms.

24  
25  
26  
27 The inclusion criteria for the clinical trial were: (a) age 18 years or older; (b) a  
28  
29  
30 diagnosis of ADHD; (c) access to a computer or smartphone with Internet access, (d) the  
31  
32  
33 ability to read and write the Norwegian language. The exclusion criteria were: (a) severe  
34  
35  
36 mental illness, such as major depression, suicidality, bipolar disorder, psychosis, or substance  
37  
38  
39 abuse disorder; (b) currently participating in another psychological treatment. All participants  
40  
41  
42 who responded to the question assessing positive aspects of ADHD were included in the  
43  
44  
45 current study.  
46  
47  
48  
49

## 50 **Data collection**

51  
52  
53 The data was collected between June and October 2020. The data material consisted of the  
54  
55  
56 participants' written responses to the question: "What do you experience as positive aspects  
57  
58  
59  
60

1  
2  
3 of having ADHD?”. Along with the question, the participants were given some additional  
4  
5  
6  
7 guiding questions that could help them write their response: a) “is there any positive aspects  
8  
9  
10 related to having ADHD? b) has ADHD given you any useful knowledge or experiences? c)  
11  
12  
13 has ADHD helped you get in contact with someone you appreciate? These guiding questions  
14  
15  
16  
17 were included as examples to help the participants remind themselves of experiences of  
18  
19  
20 positive aspects related to having ADHD. The module page also gave some examples of  
21  
22  
23 positive characteristics that adults with ADHD may experience, based on previous studies,  
24  
25  
26 including being creative, accepting of others, fun, active, explorative, spontaneous, and open-  
27  
28  
29 minded. Considering that the question was text-based and therefore without the opportunity  
30  
31  
32 to ask follow-up questions, we found it necessary to include those examples to provide a  
33  
34  
35 context for the participants when answering the question. The participant could write their  
36  
37  
38 response to the question in an open-text field on the module page. The mean number of  
39  
40  
41 words in the participants responses was 72.5 words, ranging from 1 to 261 words. There were  
42  
43  
44  
45  
46  
47 no instructions on number of words or formatting and the question was not obligatory to  
48  
49  
50 answer to continue with the module or the intervention. The question was included in the  
51  
52  
53 sixth module of intervention, which was named “acceptance” and had an overall focus on  
54  
55  
56  
57 self-acceptance and self-compassion, i.e., accepting what you cannot change and being kind  
58  
59  
60

1  
2  
3 to yourself. The module included psychoeducation, videos, tasks, as well as text and audio  
4  
5  
6  
7 instructions to acceptance- and self-compassion strategies.  
8  
9

## 10 **Data analysis**

11  
12  
13 **Qualitative analysis.** The data were analyzed using thematic analysis, employing a  
14  
15  
16 hermeneutic phenomenological framework. Thematic analysis is a well-known qualitative  
17  
18 method for identifying and analyzing themes or patterns across the data [29]. Unlike some  
19  
20 other methods for qualitative data analysis, thematic analysis does not have a pre-existing  
21  
22 theoretical framework and it can therefore be applied within different frameworks. In line  
23  
24 with the framework we have chosen, we acknowledge that the analytic work is an  
25  
26 interpretative and inherently subjective activity. To ensure credibility, we have carefully  
27  
28 followed the guidelines prescribed for thematic analysis. The thematic analysis followed the  
29  
30 six phases described by Braun and Clarke (2006): 1. familiarization with data; 2. generation  
31  
32 of codes; 3. search for themes; 4. reviewing themes; 5. finalize and naming of themes, and 6.  
33  
34 producing the report.  
35  
36  
37  
38  
39  
40  
41  
42  
43  
44  
45  
46  
47  
48  
49

50 Following these steps, the first author began the analytic work by reading through the  
51  
52 data material and taking notes. This included transferring the data material from the online  
53  
54 intervention platform to the research server and reading carefully through each of  
55  
56  
57  
58  
59  
60

1  
2  
3 participants' responses while taking notes on preliminary thoughts and ideas. As a next step,  
4  
5  
6  
7 the first author generated codes in line with the analytic focus of the study: "what do adults  
8  
9  
10 with ADHD experience as positive aspects with the diagnosis". To safeguard interpretive  
11  
12  
13 credibility, the coding was conducted in a "low-inference" manner, where the codes were  
14  
15  
16 phrased closely to the participants original accounts. The data material was coded using  
17  
18  
19 NVivo software [34]. See Figure 1. for an overview of all the codes and their frequency.  
20  
21  
22  
23 Following the coding, the first author created a visual map where the codes that shared  
24  
25  
26 similarities were grouped together. The creation of the visual map was intended to provide an  
27  
28  
29 overview of the codes and to obtain preliminary ideas regarding categories and themes. All  
30  
31  
32 authors were then given an overview of the codes. The first author also presented the codes  
33  
34  
35 with illustrative examples of excerpts from the data to the second author to discuss how the  
36  
37  
38 quotes were interpreted. The first and second author continued with the third step in the  
39  
40  
41 analysis, namely searching for themes. The initial search for themes resulted in a thematic  
42  
43  
44 structure of ten themes. All authors were given an overview of these ten initial themes to  
45  
46  
47 provide their input and feedback. As a fourth step, the thematic structure was reviewed in  
48  
49  
50 more detail by the first and second author. In this analysis, it became clear that certain themes  
51  
52  
53 shared some commonalities, for instance the initial themes "energy" and "hyperfocus" shared  
54  
55  
56  
57  
58  
59  
60

1  
2  
3 overlapping features, and where thus merged into one theme. A new thematic structure was  
4  
5  
6 identified, resulting in four core themes (shown in Figure 1). These four themes were then  
7  
8  
9  
10 finalized and named by the first and second author (step 5) and the final report was produced  
11  
12  
13  
14 by all authors (step 6).  
15

### 16 17 **Figure 1. Overview of core themes, subthemes, and codes**

18  
19  
20 (Insert Figure 1 here)  
21  
22

23 **Note.** Core themes are shown within the upper boxes, whereas subthemes are shown the boxes  
24  
25 beneath. Codes are shown as bullet points and code frequency is shown in parathesis.  
26  
27

28  
29  
30 **Quantitative analysis.** In addition to the thematic analysis, differences in participant  
31  
32 characteristics and ADHD severity scores were examined using independent t-tests and chi-  
33  
34 square. SPSS was used for quantitative analyses.  
35  
36  
37

### 38 39 40 **Reflexivity**

41  
42  
43 We have strived to maintain reflexivity throughout the research process by consistently  
44  
45  
46 examining our pre-existing understanding and assumptions. During both data analysis and  
47  
48  
49 interpretation of results, the authors have actively engaged in self-reflection and peer  
50  
51  
52 discussions to identify our own preconceptions. For instance, ESN being a clinical  
53  
54  
55 psychologist, has generally been taught that symptoms of ADHD and other psychiatric  
56  
57  
58 diagnoses are inherently negative attributes and have been less exposed to the potential  
59  
60

1  
2  
3 positive aspects related to ADHD during her clinical training. To address potential biases, the  
4  
5  
6  
7 authors revisited the raw data after creation of the themes to ensure that the participants'  
8  
9  
10 perspectives were accurately represented and to validate their own interpretations.  
11  
12

### 13 **Ethics**

14  
15  
16  
17 The intervention study was approved by the Regional Committees for Medical and Health  
18  
19  
20 Research (REK-VEST, 90483). All participants gave their informed consent to participate in  
21  
22  
23 the study.  
24  
25

### 26 **Patient and Public Involvement**

27  
28  
29  
30 The user-involvement in the larger project (INTROMAT), from which the data are derived,  
31  
32  
33 has been extensive. Throughout the 5-year project period, there have been arranged several  
34  
35  
36 user-meetings with adults with ADHD to examine their needs and preferences to  
37  
38  
39 psychological interventions for ADHD. Adults with ADHD have also been involved in the  
40  
41  
42 development of content and videos to the intervention, as well as evaluating the intervention.  
43  
44  
45

46  
47 In these user-meetings, we did not address the research question or research design for the  
48  
49  
50 current study, however, the focus of the current study was informed by previous qualitative  
51  
52  
53 studies involving adults with ADHD who have expressed a wish for both research and  
54  
55  
56 treatment interventions for ADHD to have a stronger focus on positive aspects related  
57  
58  
59  
60



1  
2  
3  
4 ADHD. The results from the current study will be published on the project website where  
5  
6  
7 study participants can be informed. We will also present the findings at meetings for the  
8  
9  
10 ADHD patient association, which contributed to the recruitment of participants to the current  
11  
12  
13 study.  
14  
15

## 16 17 **Results**

### 18 19 20 **Participants**

21  
22  
23 Among the 109 participants of the intervention study, 62 participants accessed the module  
24  
25  
26 which included the question on positive aspects of ADHD, and 50 gave their response. The  
27  
28  
29 remaining 47 participants did not access the module, and consequently, did not have the  
30  
31  
32 opportunity to view and respond to the question. None of these 47 participants accessed the  
33  
34  
35 following module either and were thereby considered to be dropouts. When comparing the  
36  
37  
38 responders ( $N = 50$ ) to the non-responders ( $N = 59$ ), there were no significant differences in  
39  
40  
41 age, medication status, age when diagnosed, gender, education, employment status or ADHD  
42  
43  
44 severity scores.  
45  
46  
47

48  
49  
50 The final sample included 50 participants, with a large majority being female. All but  
51  
52  
53 one were diagnosed with ADHD in adulthood, with 4.8 years being the mean time since  
54  
55  
56 being diagnosed. A total of 37 (72.5%) participants were full-time employed or students and  
57  
58  
59  
60

30 (58.8%) participants had higher education. When comparing males and females in the final sample, the males were significantly older than the females (See Table 1).

**Table 1.** Participant characteristics, gender differences and ADHD severity scores

|                                | Total sample | Female      | Male         |
|--------------------------------|--------------|-------------|--------------|
| N (%)                          | 50           | 44 (88.0%)  | 6 (12.0%)    |
| Age, M (SD)                    | 34 (9.5)     | 33.3 (8.8)  | 42.2 (12.2)* |
| Age when diagnosed, M (SD)     | 29.5 (8.5)   | 28.9 (8.5)  | 33.7 (7.9)   |
| ADHD medication, n (%)         |              |             |              |
| <i>Daily</i>                   | 38 (76.0%)   | 34 (77.3%)  | 4 (66.7%)    |
| <i>Occasionally</i>            | 4 (8.0%)     | 4 (9.1%)    | -            |
| <i>Not taking medication</i>   | 8 (16.0%)    | 6 (13.6%)   | 2 (33.3%)    |
| ADHD symptoms                  |              |             |              |
| <i>ASRS full scale, M (SD)</i> | 49.2 (10.4)  | 49.6 (10.1) | 46.3 (12.1)  |
| <i>Inattention, M (SD)</i>     | 26.2 (5.4)   | 26.3 (5.5)  | 25.5 (5.5)   |
| <i>Hyperactivity, M (SD)</i>   | 22.9 (6.3)   | 23.2 (7.8)  | 20.8 (6.1)   |

Note. n = number of participants, ASRS = Adult ADHD Self-Report Scale. \* $p < .05$ .

## Thematic analysis

The participants reported that they experienced a variety of benefits and advantages related to having ADHD, where all but two participants reported that they experienced ADHD to have positive aspects. With regards to ADHD medication, there were two participants who specifically reported that medications contributed to their positive experiences with ADHD, with one participant reporting that the positive aspects of ADHD were only experienced when taking medication. In the thematic analysis the participants' positive experiences associated with having ADHD were arranged within four core themes: 1) the dual impact of ADHD characteristics; 2) the unconventional mind; 3) the pursuit of new experiences; and 4) resilience and growth (See Table 2).

**Table 2. Overview of core themes**

| Core theme                                  | Example of participant quotations                                                                                                    |
|---------------------------------------------|--------------------------------------------------------------------------------------------------------------------------------------|
| 1 - The dual impact of ADHD characteristics | <i>"I have understood that my energy can be used for a lot of good, and that if I use it wrong, it can make things challenging."</i> |
| 2 - The unconventional mind                 | <i>"Creativity, and being able to think outside the norm, is something I really appreciate."</i>                                     |

1  
2  
3  
4 3 - The pursuit of new experiences  
5  
6  
7  
8  
9

*“I enjoy trying new things and changes. This is the reason why I have the job that I have”.*

10  
11 4 - Resilience and growth  
12  
13  
14  
15  
16  
17  
18  
19  
20  
21  
22

*“The road to my final ADHD diagnosis has been so long and cruel, but I would not have been without all the pain and unbearable years, and all that experience made me know myself in a completely unique way.”*

---

### 30 **Theme 1: The dual impact of ADHD characteristics**

31  
32  
33  
34 Many of the participants stated that even core characteristics of ADHD, such as hyperactivity  
35  
36  
37 and impulsivity, could be experienced as positive features. Although these core  
38  
39  
40 characteristics could be troublesome, they could also be advantageous and beneficial in some  
41  
42  
43 situations.  
44

45  
46  
47 High levels of energy and drive were reported to be useful in many contexts, such as  
48  
49  
50 during physical labor, sports, social events, or home renovation. One participant stated: *“I am*  
51  
52  
53 *active. I am often able to do a lot in a short amount of time, and then I get to experience*  
54  
55  
56 *more”* (Female, 30 years). However, although there were positive aspects to having high  
57  
58  
59  
60

1  
2  
3 energy levels, there could also be downsides: *“I have understood that my energy can be used*  
4  
5  
6  
7 *for a lot of good, and that if I use it wrong, it can make things challenging”* (Female, 26  
8  
9  
10 years). The participants also reported that they did not tire as easily as others: *“If it is*  
11  
12  
13 *something I really like, I have better endurance than others. I can work on something I enjoy*  
14  
15  
16 *forever without stopping”* (Female, 26 years)

17  
18  
19  
20  
21 Several participants also reported spontaneity and risk-taking, which may be  
22  
23  
24 categorized as impulsive traits, as positive aspects associated with ADHD: *“I am*  
25  
26  
27 *spontaneous/impulsive. I can easily just ‘jump into it’ and that has given me a lot of great*  
28  
29  
30 *experiences’* (Female, 30 years). It was also mentioned that spontaneity contributed to  
31  
32  
33 memorable experiences and learning. However, some emphasized that spontaneity could be  
34  
35  
36 challenging as well: *“I am not really that fond of that spontaneous side of myself because I*  
37  
38  
39 *experience losing control, but at the same time it has given me unique friendships, relations*  
40  
41  
42 *and possibilities”* (Female, 28 years).

43  
44  
45  
46  
47 Hyperfocusing, the ability to have an intense focus on an activity for a longer period  
48  
49  
50 of time, was commonly mentioned as an advantage of having ADHD. The participants stated  
51  
52  
53 that if they were really interested in a topic, they could maintain focus for a long time without  
54  
55  
56 being distracted. Hyperfocus was mentioned to be a contributing factor for completing  
57  
58  
59  
60

1  
2  
3  
4 demanding educational courses, school exams and job assignments. One participant stated  
5  
6  
7 that hyperfocusing served as a compensatory strategy: *“I think my ADHD has helped me*  
8  
9  
10 *throughout the exam periods. If it had not been for a kind of hyperfocus, it would not have*  
11  
12  
13 *worked. But then again, I might not have postponed the reading for so long if I did not have*  
14  
15  
16 *ADHD”* (Female, 23 years). Another participant emphasized that the hyperfocus on useful  
17  
18  
19 task for it to be considered as a positive aspect of ADHD: *“The only positive is hyperfocus*  
20  
21  
22 *on tasks that are really exciting, but for ADHD to be considered positive in this setting, the*  
23  
24  
25 *task has to be something useful, such as school or work”* (Male, 31 years). Most of the  
26  
27  
28 participants did not report inattention be positive, however, one participant explicitly  
29  
30  
31 mentioned inattention to also have upsides: *“Inattention can be nice when I actually need to*  
32  
33  
34 *change focus, if something happens while I am driving etc. It is also nice because I have*  
35  
36  
37 *observed some amusing conversations and such when I am actually supposed to be doing*  
38  
39  
40 *something else”* (Female, 26 years).  
41  
42  
43  
44  
45  
46

## 47 **Theme 2: The unconventional mind**

48  
49  
50 Many participants reported that they experienced unconventional thinking and  
51  
52  
53 behavior as positive aspects of having ADHD. This included characteristics such as being  
54  
55  
56 creative, having novel ideas, seeing things from a different perspective than others, and being  
57  
58  
59  
60

1  
2  
3  
4 good at finding solutions. At the same time, it was also emphasized that the social context  
5  
6  
7 and expectations present in one's socio-cultural environment could sometimes be an obstacle  
8  
9  
10 for utilizing these strengths.  
11  
12

13  
14 Creativity was emphasized to be a positive aspect of ADHD by many participants:

15  
16  
17 *“Creativity and being able to think outside the norm is something I really appreciate”*  
18

19  
20 (Female, 26 years)  
21  
22

23  
24 Creativity was reported to help one to start new projects and find good solutions at  
25  
26 work, as well as make everyday life more exciting: *“I am creative and solution-oriented and*  
27  
28 *very passionate about the things that I am interested in”* (Male, 32 years). Creativity was also  
29  
30 mentioned to be a good quality when it came to parenting as it facilitated playfulness with  
31  
32 one's children. Although creativity was viewed as a positive trait by many participants, some  
33  
34 emphasized a complexity: *“From my experience in a work-related context, thinking outside*  
35  
36 *the box is not as accepted in all contexts, despite good results”* (Female, 27 years). With this,  
37  
38 the participant underscores that whether a quality is deemed as “good” or “bad” is also  
39  
40 dependent on one's social context.  
41  
42  
43  
44  
45  
46  
47  
48  
49  
50  
51  
52

53  
54 There were also participants who described that they could be socially unconventional  
55  
56 and go outside the norm: *“I do not care that much about what other think”* (Female, 41 years).  
57  
58  
59  
60

1  
2  
3 Some reported that they could be quite straightforward, unafraid, and uninhibited in social  
4  
5  
6  
7 situations: *“I am pretty forward, and I am not afraid to take up space when I need a bit of*  
8  
9  
10 *attention. I know a lot of people and that is probably because I am not scared to say hi to new*  
11  
12  
13 *people”* (Female, 23 years).

### 17 **Theme 3: The pursuit of new experiences**

18  
19  
20 There were several participants who reported that they experienced adventurousness  
21  
22  
23 and novelty-seeking as positive aspects of ADHD. Being explorative also appeared to be  
24  
25  
26 connected to being both curious and courageous, with some participants describing that they  
27  
28  
29 were curious of the unknown and not afraid to embark on new ventures.  
30  
31  
32

33  
34 Many emphasized that they were curious and enjoyed trying new things and seeking  
35  
36  
37 new experiences. The participants also reported that they enjoyed learning new things: *“I*  
38  
39  
40 *seek new environments where I can learn new things”* (Female, 29 years). Because they  
41  
42  
43 enjoyed learning, they also acquired knowledge about various topics. In line with this, one  
44  
45  
46 participant also underlined that they would not give up easily when attempting to learn  
47  
48  
49 something new: *“I enjoy trying new things, and if I do not get it right the first time, I will*  
50  
51  
52 *examine the possibility of trying a simpler method.”* (Female, 30 years). To enjoy novelty  
53  
54  
55  
56  
57  
58  
59  
60



1  
2  
3  
4 was also reported to be of significance to one's choice of occupation: "*I enjoy trying new*  
5  
6  
7 *things and changes. This is the reason why I have the job that I have*" (Female, 42 years).  
8  
9

10  
11 There were also reports about being courageous and unafraid, which could push one  
12  
13 to seek new experiences: "*I have experienced things that only would have happened by*  
14  
15  
16 *taking a risk*" (Male, 62 years). Moreover, being impulsive could make one more daring: "*I*  
17  
18 *dare more than when I sit down and think about it*" (Female, 29 years).  
19  
20  
21  
22

#### 23 24 **Theme 4: Resilience and growth**

25  
26  
27 The final theme centers around the participants' experiences of growth and insight  
28  
29 after facing adversity. The participants underscored that although ADHD indeed could be  
30  
31 challenging, especially the process towards being diagnosed with ADHD, coping with these  
32  
33 challenges could also foster resilience and growth.  
34  
35  
36  
37  
38  
39

40  
41 Some of the participants reported to have a better understanding and acceptance for  
42  
43 themselves because of ADHD: "*Being diagnosed with ADHD made me learn a lot about*  
44  
45  
46 *myself. Things I perhaps have been annoyed about, I can now accept and think that it is not*  
47  
48  
49 *'my fault' in a way*" (Female, 30 years). Although the process of getting diagnosed could be  
50  
51  
52  
53 tough, it could also give valuable insight: "*The road to my final ADHD diagnosis has been so*  
54  
55  
56  
57 *long and cruel, but I would not have been without all the pain and unbearable years, and all*  
58  
59  
60

1  
2  
3  
4 *that experience made me know myself in a completely unique way, and I have gotten a very*  
5  
6  
7 *valued quality when it comes to being able to reflect over situations both I and others are in”*  
8  
9

10 (Female, 25 years).  
11  
12

13  
14 The participants also expressed resilience after coping with previous challenges: “*I*  
15  
16 *am better at handling resistance or challenges now, because I have learned to handle such*  
17  
18 *challenges, it is part of life to have ups and downs”* (Female, 51 years) Likewise, coping with  
19  
20 challenges could also make one more persistent: “*I have learned to not give up in the face of*  
21  
22 *resistance. Maybe I must take some detours, do things differently than others, find out what*  
23  
24 *works for me and trust myself, but the point is, I can make it if I want to”* (Female, 28 years).  
25  
26  
27  
28  
29  
30  
31  
32

33  
34 The experience of receiving the diagnosis appeared to be especially important: “*To*  
35  
36 *get the diagnosis was a relief because it gave me an explanation for why I did things I did not*  
37  
38 *understand earlier, such as why I was not able to shut up, but talk without thinking, and why*  
39  
40 *my emotions fluctuate so much, and often without me understanding why. It has given me*  
41  
42 *more understanding and acceptance for myself”* (Female, 57 years). When the participants  
43  
44  
45  
46  
47  
48  
49  
50  
51  
52  
53  
54  
55  
56  
57  
58  
59  
60  
learned about the diagnosis, it allowed them to be more kind towards themselves: “*I*  
*discovered that I have ADHD in adulthood, so I lived most of my life in the belief that I am*  
*like everyone else. I have had high expectations to myself, compared myself to others, and*

1  
2  
3  
4 *achieved a lot (...) So when I found out about my challenges, it all became like a piece of*  
5  
6  
7 *cake. I could with good reasons lower the expectations to myself and finally rest with a clear*  
8  
9  
10 *conscience” (Female, 37 years).*  
11  
12

13  
14 The participants also reported that they were non-judgmental and accepting of other  
15  
16  
17 people: *“Since I am such a “fool” I don’t judge others for being it”* (Female, 24 years). The  
18  
19  
20 participants also reported to be more empathic and understanding of others’ point of view.  
21  
22

23  
24 Several participants had jobs that involved working with people with disabilities, where  
25  
26  
27 having ADHD themselves could help them to connect with their students or patients: *“As a*  
28  
29  
30 *teacher, ADHD helps me to understand students that have a learning disability”* (Male, 31  
31  
32  
33 years). Another participant stated: *«I understand a part of the youth on a different level than*  
34  
35  
36 *my colleagues, and I therefore experience that I am able to get a better connection with the*  
37  
38  
39 *students others find it difficult to get close to”* (Female, 44 years). Another participant also  
40  
41  
42  
43 shared similar experiences: *“I notice that I can meet children with ADHD with more*  
44  
45  
46 *understanding, so they feel safe with me quickly, and I know I can help them in challenging*  
47  
48  
49 *situations, or prepare them a bit extra, so that they are able to get through their school day”*  
50  
51  
52  
53  
54 (Female, 30 years).  
55  
56

## 57 Discussion

58  
59  
60

1  
2  
3  
4 The current study aimed to identify and explore positive aspects of having ADHD from the  
5  
6  
7 perspective of help-seeking adults with the diagnosis. The participants' accounts of positive  
8  
9  
10 experiences of having ADHD could be arranged within the following four themes: 1) the dual  
11  
12  
13 impact of ADHD characteristics; 2) the unconventional mind; 3) the pursuit of new  
14  
15  
16 experiences; and 4) resilience and growth. Through the discussion, we further seek to  
17  
18  
19 highlight how positive experiences with the diagnosis can be utilized in treatment  
20  
21  
22 interventions.  
23  
24

25  
26  
27 The characteristics of ADHD could be experienced as a double-edged sword, where  
28  
29  
30 the traits could be seen as both challenging and beneficial. This is in accordance with findings  
31  
32  
33 in several studies included in the review by Ginapp et al. (2022) and Schippers et al. (2022).  
34  
35  
36 The direction of this relationship further seemed to be dependent upon context and the norms  
37  
38  
39 in one's socio-cultural environment, where certain qualities could be deemed as beneficial in  
40  
41  
42 some situations, but undesirable in other situations. Although one's environment appeared to  
43  
44  
45 be central in the participants' experience of duality related to ADHD characteristics,  
46  
47  
48 individual factors are still important to take into consideration; one person might find a  
49  
50  
51 certain characteristic as beneficial, while another might not share the same perspective. As  
52  
53  
54 such, whether a characteristic is seen as positive or negative is likely dependent on a variety  
55  
56  
57  
58  
59  
60

1  
2  
3 of factors, including individual factors, environmental factors, and the interaction between the  
4  
5  
6  
7 two.

8  
9  
10 From the perspective of the participants, it appeared that even core diagnostic  
11  
12  
13 characteristics of ADHD could be experienced as advantageous. For instance, the high energy  
14  
15  
16 associated with hyperactivity could be considered as an advantage in certain social settings  
17  
18  
19 and within sports, whereas hyperfocus could be beneficial during school exams or at work.  
20  
21  
22 These findings are in line with results reported in previous qualitative studies [22, 23]. As  
23  
24  
25 such, the analytic findings support the notion that some of the characteristics associated with  
26  
27  
28 ADHD can be reframed in a more positive manner. Given the high persistence of ADHD  
29  
30  
31 symptoms into adulthood, helping adults to explore potential advantages of their symptoms in  
32  
33  
34 a treatment-setting could perhaps have favorable outcomes for treatment and improve life  
35  
36  
37 satisfaction [17]  
38  
39  
40  
41  
42  
43

44 On the other hand, the present findings resonate with results from several other  
45  
46  
47 previous studies showing that ADHD characteristics are associated with problems that affect  
48  
49  
50 daily-life functioning [35-37]. Based on the current reports, it appeared that the participants  
51  
52  
53 had to figure out the ways to make ADHD work for them, with certain traits, such as  
54  
55  
56 hyperfocus and high energy, only being considered beneficial under the right circumstances.  
57  
58  
59  
60

1  
2  
3  
4 This reasoning can imply that a key step in psychological interventions for ADHD would be  
5  
6  
7 to not only identify the participants' strengths, but also to examine in what contexts these  
8  
9  
10 strengths are useful and potential pitfalls or obstacles for utilizing them.  
11  
12

13  
14 Interestingly, only one of the participants reported inattention to be beneficial. In  
15  
16  
17 relation to this, a study on ADHD and identity among youth with ADHD found that while  
18  
19  
20 several participants experienced positive sides to hyperactivity and impulsivity and integrated  
21  
22  
23 these as part of their identity, inattentive symptoms were not associated with such positive  
24  
25  
26 experiences [38]. The experience of living with inattentive versus hyperactive/impulsive  
27  
28  
29 traits should be an interesting topic for future studies.  
30  
31  
32

33  
34 The findings further show that creativity seems to be experienced as a core positive  
35  
36  
37 aspect of having ADHD. These findings are in line with results from previous studies, which  
38  
39  
40 have associated ADHD symptoms with certain qualities of creativity [39, 40]. Distractibility  
41  
42  
43 has for example been associated with creative achievements [41]. As such, it may be that  
44  
45  
46 distractibility makes one notice more so-called "irrelevant" information in one's  
47  
48  
49 environment, which later may be helpful in generating more original ideas [41]. Given that  
50  
51  
52 creativity may be a strength of ADHD, it should be possible to take advantage of this quality  
53  
54  
55  
56  
57  
58  
59  
60

1  
2  
3  
4 in treatment-settings, for example by including more creative tasks in psychosocial  
5  
6  
7 interventions to facilitate engagement and adherence.  
8  
9

10           The current accounts further show that traits such as adventurousness, exploration,  
11  
12  
13 and courage may be seen as strengths of ADHD. Such strengths have also been reported by  
14  
15  
16 adults with ADHD in previous studies [23, 25, 42]. In their study, Newark et al. (2016) found  
17  
18  
19 courage to be a resource among adults with ADHD and they further linked this trait to self-  
20  
21  
22 efficacy and self-esteem. The authors further emphasized that courage could be a valuable  
23  
24  
25 skill in therapy, a situation where clients indeed are faced with both challenges and novel  
26  
27  
28 experiences [36].  
29  
30  
31  
32

33           Lastly, it appeared like coping with the challenges associated with ADHD could lead  
34  
35  
36 to resilience and growth for some participants. There were reports about understanding  
37  
38  
39 oneself and others in a more nuanced manner, and successful coping was seen as making  
40  
41  
42 them more fit to cope with future challenges. This is in line with findings from a previous  
43  
44  
45 study including women with ADHD, where the participants identified positive learning from  
46  
47  
48 the challenges they had faced [25]. When people are faced with adversity, they often  
49  
50  
51 underestimate their abilities to cope with the emotional distress and overestimate the intensity  
52  
53  
54 and impact of the particular event [43]. In line with this, some participants seemed to cope  
55  
56  
57  
58  
59  
60

1  
2  
3  
4 with the challenges related to ADHD in a resilient manner and perhaps even experience  
5  
6  
7 growth during times of adversity. These findings may be understood within Dombrowski's  
8  
9  
10 theory of positive disintegration, which posits that emotional difficulty and turmoil are  
11  
12  
13 necessary for human growth and development [44]. It has further been suggested that  
14  
15  
16 resilience is linked to impulsivity, where impulsive traits may help adults to faster move on  
17  
18  
19 from their problems, which may be useful in therapy-settings [45].  
20  
21  
22

### 23 **Implications**

24  
25  
26  
27 The clinical implications of the findings may be to incorporate a stronger focus on strengths  
28  
29  
30 and resources in both the assessment and treatment of ADHD in adulthood. There is a  
31  
32  
33 consensus within psychotherapy that treatment should not only focus on the absence of  
34  
35  
36 symptoms, but also on recovery, coping, well-being, and growth [46]. However, adults with  
37  
38  
39 ADHD still report current treatment options to be too deficit-oriented [19]. By putting an  
40  
41  
42 emphasis on the full range of experiences related to ADHD, both good and bad, one might be  
43  
44  
45 able to offer treatment interventions more in line with the needs of adults with ADHD, which  
46  
47  
48 may be favorable for treatment engagement and clinical outcomes. For instance, therapist  
49  
50  
51 could help adults with ADHD to identify strengths, which may be beneficial for self-esteem  
52  
53  
54 and self-efficacy. Within cognitive-behavioral therapy, one could also use positive  
55  
56  
57  
58  
59  
60



1  
2  
3 experiences with ADHD to reframe negative automatic thoughts or maladaptive cognitions.

4  
5  
6  
7 These speculations should indeed provide interesting topics for further studies. A focus on

8  
9  
10 positive sides to ADHD within research may also have societal implications by changing

11  
12  
13 social perception around ADHD and by this reducing stigma related to the diagnosis.

### 14 15 16 17 **Strengths and limitations**

18  
19  
20 The current study is one of few studies that focus on positive aspects of ADHD, and one of

21  
22  
23 few with a fairly large sample size. Moreover, this study is the only study investigating

24  
25  
26 positive aspects in a sample of help-seeking adults with ADHD. Still, several limitations

27  
28  
29 should be noted. With the current study design and analysis, we can only explore the

30  
31  
32 participants' experiences with positive aspects of ADHD and give a thematic structure of

33  
34  
35 these experiences. However, future studies combining qualitative and quantitative analyses

36  
37  
38 are needed to further evaluate the generalizability of the positive aspects of ADHD reported

39  
40  
41 in this and previous studies. The sample of the present study was restricted to only include

42  
43  
44 participants who responded to a question regarding positive traits, which only was about half

45  
46  
47 of the participants in the clinical trial. The lower response rate is likely due to the question

48  
49  
50 being asked at the end of the intervention and several participants had been lost to drop-out

51  
52  
53 and thus never accessed the question on positive aspects of ADHD. The impact of being

1  
2  
3  
4 participants in a psychological intervention should also be commented on. For example, it is  
5  
6  
7 possible that taking part in the intervention increased the participants' positive beliefs about  
8  
9  
10 themselves and ADHD. The participants did also receive some examples of positive aspects  
11  
12  
13 with ADHD in the intervention which may have influenced their answers. We found it  
14  
15  
16 necessary to include these examples since the data collection was conducted online without  
17  
18  
19 the guidance of a researcher. As such, when conducting the data analysis and creating the  
20  
21  
22 themes, we were careful to examine depth and richness in the participants answers and not  
23  
24  
25 only frequency. The examples were reported 47 times in the data material, with creativity  
26  
27  
28 being the trait most frequently referred to in the data material (27 references). However,  
29  
30  
31 creativity was also the most frequently mentioned positive aspect of ADHD in Schippers et al  
32  
33  
34 (2022) study. Moreover, we found it reassuring that the participants' answers went beyond  
35  
36  
37 the examples given. The participants of the study mainly consisted of high-functioning  
38  
39  
40 females in their 20s and 30s who were diagnosed with ADHD as adults and were seeking  
41  
42  
43 psychological help for ADHD. The sample did therefore include more females than males,  
44  
45  
46 which makes the findings less transferable to males since the clinical expression of ADHD is  
47  
48  
49 known to vary with gender [47]. It may also be seen as a limitation that the ADHD diagnosis  
50  
51  
52 was based on self-report. To ensure validity of the diagnosis, it could have been beneficial to  
53  
54  
55  
56  
57  
58  
59  
60

1  
2  
3  
4 conduct a clinical re-examination to confirm that the participants met the diagnostic criteria.  
5  
6

7 However, all participants were asked to report the date, venue and diagnosing healthcare  
8  
9

10 professional for the diagnosis, as well as their national identity number. We therefore have  
11  
12

13 trust in the participants' reports. In addition, because participants with ongoing severe mental  
14  
15

16 illness were excluded from the study, the participants are most likely individuals within the  
17  
18

19 less severe end of the ADHD symptom spectrum.  
20  
21  
22

### 23 **Future directions**

24  
25  
26  
27 The findings from this study need to be validated by future studies. These studies should not  
28  
29

30 only investigate characteristics of strengths related to ADHD, but also in what contexts these  
31  
32

33 strengths are useful and beneficial. Moreover, future studies should investigate the impact of  
34  
35

36 strength-based treatments on both treatment engagement and clinical outcomes. Future  
37  
38

39 research should aim for the development of a valid procedure to assess strengths and positive  
40  
41

42 qualities of adults with ADHD. Moreover, it would also be interesting for future studies to  
43  
44

45 include other observers' impressions of positive aspects related to ADHD, for instance family  
46  
47

48 members and clinicians.  
49  
50  
51

### 52 **Conclusion**

53  
54  
55  
56  
57  
58  
59  
60

1  
2  
3  
4 The aim of the current study was to identify and explore positive aspects of having  
5  
6  
7 ADHD from the perspective of help-seeking adults with the diagnosis. From the perspective  
8  
9  
10 of the participants, the characteristics of ADHD could be both beneficial and challenging,  
11  
12  
13 depending upon the individuals' contextual environment. For clinicians, it may be important  
14  
15  
16 to examine the individual's positive experiences of ADHD, as this should be capitalized upon  
17  
18  
19 in treatment. A stronger focus on positive aspects of ADHD in treatment interventions,  
20  
21  
22 alongside the challenges, may also help to contribute to support a more ability-oriented view  
23  
24  
25  
26  
27 of ADHD.  
28  
29  
30  
31  
32

### 33 **Declarations**

### 34 **Acknowledgements**

35  
36  
37 The authors would like to thank all participants who took part in the study. We would also  
38  
39  
40 like to thank the adults with ADHD who took part in the developmental process of the  
41  
42  
43  
44  
45  
46  
47 intervention.  
48  
49

### 50 **Conflict of interest**

51  
52  
53 The authors declare that they have no conflict of interests.  
54  
55

### 56 **Author contributions**

1  
2  
3  
4 ESN contributed to the recruitment of participants for the clinical trial, was responsible for  
5  
6  
7 the thematic analysis, interpretation of the results, and drafting of the manuscript. FG  
8  
9  
10 contributed substantially to the thematic analysis and interpretation of the results, and with  
11  
12  
13 comments and input to different versions of the manuscript. TN was responsible for the  
14  
15  
16 clinical trial (PI) and contributed with comments and input to the manuscript. AJL was  
17  
18  
19 responsible for the idea of the current study and contributed substantially with comments and  
20  
21  
22 input on different drafts of the manuscript. All authors have read and accepted the final draft  
23  
24  
25  
26  
27 of the manuscript.  
28  
29

### 30 **Data statement**

31  
32  
33 The data is available from the corresponding author upon reasonable request.  
34  
35

### 36 **Funding**

37  
38  
39  
40 This data used in the current study is from the INTROMAT project, funded by The Research  
41  
42  
43 Council of Norway (grant: 259293). ESN received funding from the Western Norway  
44  
45  
46 Regional Health Authorities (Helse Vest) for her doctoral thesis (grant: F-11016).  
47  
48  
49

### 50 **Ethics approval and consent to participate**

51  
52  
53 The study was received ethical approval from the Regional Committees for Medical and  
54  
55  
56 Health Research, Region West (REK-vest, 90483) in Norway. All participants gave their  
57  
58  
59  
60

informed consent to participate. All methods were carried out in accordance with relevant regulations and guidelines for research on human subjects and data.

## References

1. Polanczyk, G., M.S. De Lima, B.L. Horta, J. Biederman, and L.A. Rohde, *The worldwide prevalence of ADHD: a systematic review and metaregression analysis*. American Journal of Psychiatry, 2007. **164**(6): p. 942-948.
2. Song, P., M. Zha, Q. Yang, Y. Zhang, X. Li, and I. Rudan, *The prevalence of adult attention-deficit hyperactivity disorder: A global systematic review and meta-analysis*. Journal of global health, 2021.
3. Chung, W., S.-F. Jiang, D. Paksarian, A. Nikolaidis, F.X. Castellanos, K.R. Merikangas, and M.P. Milham, *Trends in the prevalence and incidence of attention-deficit/hyperactivity disorder among adults and children of different racial and ethnic groups*. JAMA network open, 2019. **2**(11): p. e1914344-e1914344.
4. Nussbaum, N.L., *ADHD and female specific concerns: a review of the literature and clinical implications*. Journal of attention disorders, 2012. **16**(2): p. 87-100.
5. American Psychiatric Association, *Diagnostic and statistical manual of mental disorders: DSM-5*. 5th ed. 2013, Washington, D.C: American Psychiatric Association.
6. Willcutt, E.G., A.E. Doyle, J.T. Nigg, S.V. Faraone, and B.F. Pennington, *Validity of the executive function theory of attention-deficit/hyperactivity disorder: a meta-analytic review*. Biological psychiatry, 2005. **57**(11): p. 1336-1346.
7. Shaw, P., A. Stringaris, J. Nigg, and E. Leibenluft, *Emotion dysregulation in attention deficit hyperactivity disorder*. American Journal of Psychiatry, 2014. **171**(3): p. 276-293.
8. Solberg, B.S., J. Haavik, and A. Halmøy, *Health care services for adults with ADHD: Patient satisfaction and the role of psycho-education*. Journal of attention disorders, 2019. **23**(1): p. 99-108.
9. Matheson, L., P. Asherson, I.C.K. Wong, P. Hodgkins, J. Setyawan, R. Sasane, and S. Clifford, *Adult ADHD patient experiences of impairment, service provision and clinical management in England: a qualitative study*. BMC health services research, 2013. **13**(1): p. 1-13.
10. Beaton, D.M., F. Sirois, and E. Milne, *Experiences of criticism in adults with ADHD: A qualitative study*. Plos one, 2022. **17**(2): p. e0263366.
11. Mueller, A.K., A. Fuermaier, J. Koerts, and L. Tucha, *Stigma in attention deficit hyperactivity disorder*. ADHD attention deficit and hyperactivity disorders, 2012. **4**(3): p. 101-114.
12. Lesch, K.P., *'Shine bright like a diamond!': is research on high-functioning ADHD at last entering the mainstream?* Journal of Child Psychology and Psychiatry, 2018. **59**(3): p. 191-192.
13. McDermott, V., *"Tell Me Something You Didn't Know Was Neurodivergence-Related Until Recently. I'll Start": TikTok as a Public Sphere for Destigmatizing Neurodivergence*, in *Rethinking Perception and Centering the Voices of Unique Individuals: Reframing Autism Inclusion in Praxis*. 2022, IGI Global. p. 127-147.
14. Ortega, F., *The cerebral subject and the challenge of neurodiversity*. BioSocieties, 2009. **4**(4): p. 425-445.
15. Sonuga-Barke, E. and A. Thapar, *The neurodiversity concept: is it helpful for clinicians and scientists?* The Lancet Psychiatry, 2021. **8**(7): p. 559-561.

16. Epstein, J.N. and M.D. Weiss, *Assessing treatment outcomes in attention-deficit/hyperactivity disorder: a narrative review*. The primary care companion for CNS disorders, 2012. **14**(6).
17. Hirvikoski, T., T. Lindström, J. Carlsson, E. Waaler, J. Jokinen, and S. Bölte, *Psychoeducational groups for adults with ADHD and their significant others (PEGASUS): A pragmatic multicenter and randomized controlled trial*. European Psychiatry, 2017. **44**: p. 141-152.
18. Fullen, T., S.L. Jones, L.M. Emerson, and M. Adamou, *Psychological Treatments in Adult ADHD: A Systematic Review*. Journal of Psychopathology and Behavioral Assessment, 2020. **42**: p. 500-518.
19. Schrevel, S.J., C. Dedding, and J.E. Broerse, *Why do adults with ADHD choose strength-based coaching over public mental health care? A qualitative case study from the Netherlands*. Sage Open, 2016. **6**(3): p. 1-8.
20. Hoogman, M., M. Stolte, M. Baas, and E. Kroesbergen, *Creativity and ADHD: A review of behavioral studies, the effect of psychostimulants and neural underpinnings*. Neuroscience & Biobehavioral Reviews, 2020. **119**: p. 66-85.
21. Ginapp, C.M., G. Macdonald-Gagnon, G.A. Angarita, K.W. Bold, and M.N. Potenza, *The lived experiences of adults with attention-deficit/hyperactivity disorder: A rapid review of qualitative evidence*. Frontiers in Psychiatry, 2022. **13**: p. 949321.
22. Mahdi, S., M. Viljoen, R. Massuti, M. Selb, O. Almodayfer, S. Karande, . . . S. Bölte, *An international qualitative study of ability and disability in ADHD using the WHO-ICF framework*. European child & adolescent psychiatry, 2017. **26**(10): p. 1219-1231.
23. Sedgwick, J.A., A. Merwood, and P. Asherson, *The positive aspects of attention deficit hyperactivity disorder: a qualitative investigation of successful adults with ADHD*. ADHD Attention Deficit and Hyperactivity Disorders, 2019. **11**(3): p. 241-253.
24. Redshaw, R. and L. McCormack, *"Being ADHD": a Qualitative Study*. Advances in Neurodevelopmental Disorders, 2022: p. 1-9.
25. Holthe, M.E.G. and E. Langvik, *The strives, struggles, and successes of women diagnosed with ADHD as adults*. Sage Open, 2017. **7**(1).
26. Schippers, L.M., L.I. Horstman, H.v.d. Velde, R.R. Pereira, J. Zinkstok, J.C. Mostert, . . . M. Hoogman, *A qualitative and quantitative study of self-reported positive characteristics of individuals with ADHD*. Frontiers in Psychiatry, 2022. **13**: p. 922788.
27. Lerner, D.A., I. Verheul, and R. Thurik, *Entrepreneurship and attention deficit/hyperactivity disorder: a large-scale study involving the clinical condition of ADHD*. Small Business Economics, 2019. **53**(2): p. 381-392.
28. Wiklund, J., W. Yu, R. Tucker, and L.D. Marino, *ADHD, impulsivity and entrepreneurship*. Journal of Business Venturing, 2017. **32**(6): p. 627-656.
29. Braun, V. and V. Clarke, *Using thematic analysis in psychology*. Qualitative Research in Psychology, 2006. **3**(2): p. 77-101.
30. Binder, P.-E., H. Holgersen, and C. Moltu, *Staying close and reflexive: An explorative and reflexive approach to qualitative research on psychotherapy*. Nordic Psychology, 2012. **64**(2): p. 103-117.
31. Nordby, E.S., R. Gjestad, R.M. Kenter, F. Guribye, S.K. Mukhiya, A.J. Lundervold, and T. Nordgreen, *The Effect of SMS Reminders on Adherence in a Self-Guided Internet-Delivered Intervention for Adults With ADHD*. Frontiers in Digital Health, 2022. **4**.
32. Kenter, R.M.F., A.J. Lundervold, and T. Nordgreen, *A self-guided Internet-delivered intervention for adults with ADHD: a protocol for a randomized controlled trial*. Internet Interventions, 2021.
33. Sheehan, D.V., Y. Lecrubier, K.H. Sheehan, P. Amorim, J. Janavs, E. Weiller, . . . G.C. Dunbar, *The Mini-International Neuropsychiatric Interview (MINI): the development and validation of a structured diagnostic psychiatric interview for DSM-IV and ICD-10*. The Journal of clinical psychiatry, 1998. **59**(20): p. 22-33.
34. QSR, *Nvivo 12 Computer Software*. 2016.

- 1  
2  
3 35. Lefler, E.K., G.M. Sacchetti, and D.I. Del Carlo, *ADHD in college: A qualitative analysis*. ADHD Attention Deficit and Hyperactivity Disorders, 2016. **8**(2): p. 79-93.
- 4  
5 36. Watters, C., D. Adamis, F. McNicholas, and B. Gavin, *The impact of attention deficit hyperactivity disorder (ADHD) in adulthood: a qualitative study*. Irish Journal of Psychological Medicine, 2018. **35**(3): p. 173-179.
- 6  
7  
8 37. Michielsen, M., J.T.C. de Kruif, H.C. Comijs, S. van Mierlo, E.J. Semeijn, A.T. Beekman, . . . J.S. Kooij, *The burden of ADHD in older adults: a qualitative study*. Journal of Attention Disorders, 2018. **22**(6): p. 591-600.
- 9  
10  
11 38. Jones, S. and M. Hesse, *Adolescents with ADHD: Experiences of having an ADHD diagnosis and negotiations of self-image and identity*. Journal of attention disorders, 2018. **22**(1): p. 92-102.
- 12  
13  
14 39. Boot, N., B. Nevicka, and M. Baas, *Creativity in ADHD: goal-directed motivation and domain specificity*. Journal of attention disorders, 2020. **24**(13): p. 1857-1866.
- 15  
16  
17 40. White, H.A. and P. Shah, *Creative style and achievement in adults with attention-deficit/hyperactivity disorder*. Personality and Individual Differences, 2011. **50**(5): p. 673-677.
- 18  
19  
20 41. Zabelina, D., A. Saporta, and M. Beeman, *Flexible or leaky attention in creative people? Distinct patterns of attention for different types of creative thinking*. Memory & cognition, 2016. **44**(3): p. 488-498.
- 21  
22  
23 42. Newark, P.E., M. Elsässer, and R.-D. Stieglitz, *Self-esteem, self-efficacy, and resources in adults with ADHD*. Journal of Attention Disorders, 2016. **20**(3): p. 279-290.
- 24  
25  
26 43. Wilson, T.D. and D.T. Gilbert, *Affective forecasting: Knowing what to want*. Current directions in psychological science, 2005. **14**(3): p. 131-134.
- 27  
28  
29 44. Laycraft, K., *Theory of positive disintegration as a model of adolescent development*. Nonlinear dynamics, psychology, and life sciences, 2011. **15**(1): p. 29.
- 30  
31  
32 45. Newark, P.E. and R.-D. Stieglitz, *Therapy-relevant factors in adult ADHD from a cognitive behavioural perspective*. ADHD Attention Deficit and Hyperactivity Disorders, 2010. **2**(2): p. 59-72.
- 33  
34  
35 46. Seligman, M.E., *Flourish: A visionary new understanding of happiness and well-being*. 2012: Simon and Schuster.
- 36  
37  
38 47. Vildalen, V.U., E.J. Brevik, J. Haavik, and A.J. Lundervold, *Females with ADHD report more severe symptoms than males on the adult ADHD self-report scale*. Journal of attention disorders, 2019. **23**(9): p. 959-967.
- 39  
40  
41  
42  
43  
44  
45  
46  
47  
48  
49  
50  
51  
52  
53  
54  
55  
56  
57  
58  
59  
60



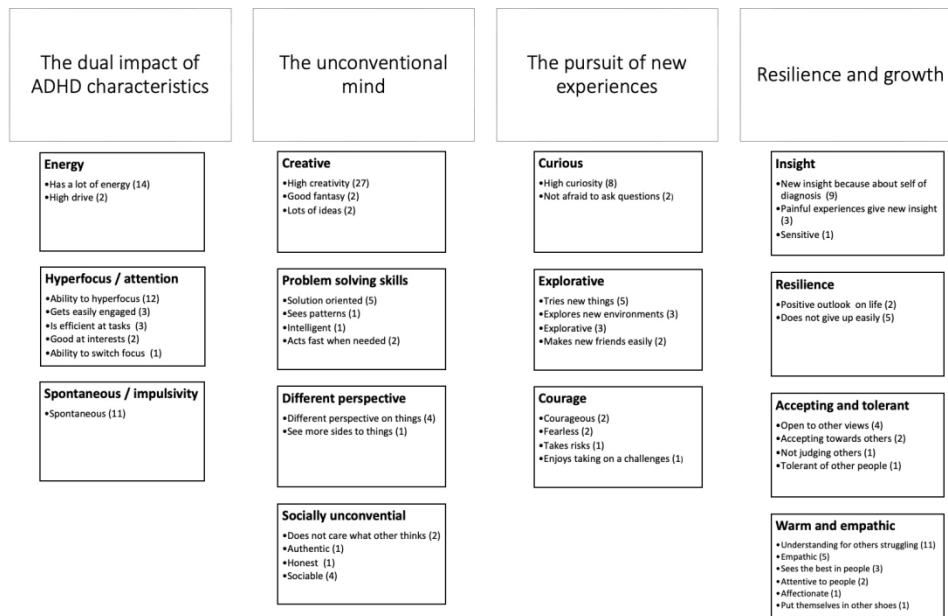

Figure 1. Overview of core themes, subthemes, and codes

297x189mm (144 x 144 DPI)

## Standards for Reporting Qualitative Research (SRQR)

O'Brien B.C., Harris, I.B., Beckman, T.J., Reed, D.A., & Cook, D.A. (2014). Standards for reporting qualitative research: a synthesis of recommendations. *Academic Medicine*, 89(9), 1245-1251.

| No. | Topic                                       | Item                                                                                                                                                                                                                                                                                                                                     | Included (YES / NO) | Page Number |
|-----|---------------------------------------------|------------------------------------------------------------------------------------------------------------------------------------------------------------------------------------------------------------------------------------------------------------------------------------------------------------------------------------------|---------------------|-------------|
|     | <b>Title and abstract</b>                   |                                                                                                                                                                                                                                                                                                                                          |                     |             |
| S1  | Title                                       | Concise description of the nature and topic of the study identifying the study as qualitative or indicating the approach (e.g., ethnography, grounded theory) or data collection methods (e.g., interview, focus group) is recommended                                                                                                   | YES                 | 1           |
| S2  | Abstract                                    | Summary of key elements of the study using the abstract format of the intended publication; typically includes objective, methods, results, and conclusions                                                                                                                                                                              | YES                 | 2           |
|     | <b>Introduction</b>                         |                                                                                                                                                                                                                                                                                                                                          |                     |             |
| S3  | Problem formulation                         | Description and significance of the problem/phenomenon studied; review of relevant theory and empirical work; problem statement                                                                                                                                                                                                          | YES                 | 5 - 6       |
| S4  | Purpose or research question                | Purpose of the study and specific objectives or questions                                                                                                                                                                                                                                                                                | YES                 | 6           |
|     | <b>Methods</b>                              |                                                                                                                                                                                                                                                                                                                                          |                     |             |
| S5  | Qualitative approach and research paradigm  | Qualitative approach (e.g., ethnography, grounded theory, case study, phenomenology, narrative research) and guiding theory if appropriate; identifying the research paradigm (e.g., positivist, constructivist/interpretivist) is also recommended                                                                                      | YES                 | 7           |
| S6  | Researcher characteristics and reflexivity  | Researchers' characteristics that may influence the research, including personal attributes, qualifications/experience, relationship with participants, assumptions, or presuppositions; potential or actual interaction between researchers' characteristics and the research questions, approach, methods, results, or transferability | YES                 | 11          |
| S7  | Context                                     | Setting/site and salient contextual factors; rationale <sup>a</sup>                                                                                                                                                                                                                                                                      | YES                 | 7           |
| S8  | Sampling strategy                           | How and why research participants, documents, or events were selected; criteria for deciding when no further sampling was necessary (e.g., sampling saturation); rationale <sup>a</sup>                                                                                                                                                  | YES                 | 8           |
| S9  | Ethical issues pertaining to human subjects | Documentation of approval by an appropriate ethics review board and participant consent, or explanation for lack thereof; other confidentiality and data security issues                                                                                                                                                                 | YES                 | 12          |
| S10 | Data collection                             | Types of data collected; details of data collection                                                                                                                                                                                                                                                                                      | YES                 | 9           |

|                                  |                                                                                                  |                                                                                                                                                                                                                                                                                                       |     |         |
|----------------------------------|--------------------------------------------------------------------------------------------------|-------------------------------------------------------------------------------------------------------------------------------------------------------------------------------------------------------------------------------------------------------------------------------------------------------|-----|---------|
| 1<br>2<br>3<br>4                 | methods                                                                                          | procedures including (as appropriate) start and stop dates of data collection and analysis, iterative process, triangulation of sources/methods, and modification of procedures in response to evolving study findings; rationale <sup>a</sup>                                                        |     |         |
| 5<br>6<br>7<br>8                 | S11 Data collection instruments and technologies                                                 | Description of instruments (e.g., interview guides, questionnaires) and devices (e.g., audio recorders) used for data collection; if/how the instrument(s) changed over the course of the study                                                                                                       | YES | 9       |
| 9<br>10<br>11                    | S12 Units of study                                                                               | Number and relevant characteristics of participants, documents, or events included in the study; level of participation (could be reported in results)                                                                                                                                                | YES | 11 - 13 |
| 12<br>13<br>14<br>15             | S13 Data processing                                                                              | Methods for processing data prior to and during analysis, including transcription, data entry, data management and security, verification of data integrity, data coding, and anonymization/deidentification of excerpts                                                                              | YES | 9       |
| 16<br>17<br>18<br>19             | S14 Data analysis                                                                                | Process by which inferences, themes, etc., were identified and developed, including researchers involved in data analysis; usually references a specific paradigm or approach; rationale <sup>a</sup>                                                                                                 | YES | 9       |
| 20<br>21<br>22<br>23             | S15 Techniques to enhance trustworthiness                                                        | Techniques to enhance trustworthiness and credibility of data analysis (e.g., member checking, audit trail, triangulation); rationale <sup>a</sup>                                                                                                                                                    | YES | 9       |
| 24<br>25<br>26                   | <b>Results/Findings</b>                                                                          |                                                                                                                                                                                                                                                                                                       |     |         |
| 27<br>28<br>29                   | S16 Synthesis and interpretation                                                                 | Main findings (e.g., interpretations, inferences, and themes); might include development of a theory or model, or integration with prior research or theory                                                                                                                                           | YES | 14      |
| 30<br>31<br>32                   | S17 Links to empirical data                                                                      | Evidence (e.g., quotes, field notes, text excerpts, photographs) to substantiate analytic findings                                                                                                                                                                                                    | YES | 15 - 19 |
| 33<br>34                         | <b>Discussion</b>                                                                                |                                                                                                                                                                                                                                                                                                       |     |         |
| 35<br>36<br>37<br>38<br>39<br>40 | S18 Integration with prior work, implications, transferability, and contribution(s) to the field | Short summary of main findings; explanation of how findings and conclusions connect to, support, elaborate on, or challenge conclusions of earlier scholarship; discussion of scope of application/generalizability; identification of unique contribution(s) to scholarship in a discipline or field | YES | 20      |
| 41<br>42                         | S19 Limitations                                                                                  | Trustworthiness and limitations of findings                                                                                                                                                                                                                                                           | YES | 23      |
| 43<br>44<br>45                   | <b>Other</b>                                                                                     |                                                                                                                                                                                                                                                                                                       |     |         |
| 46<br>47                         | S20 Conflicts of interest                                                                        | Potential sources of influence or perceived influence on study conduct and conclusions; how these were managed                                                                                                                                                                                        | YES | 26      |
| 48<br>49<br>50                   | S21 Funding                                                                                      | Sources of funding and other support; role of funders in data collection, interpretation, and reporting                                                                                                                                                                                               | YES | 26      |

<sup>a</sup>The rationale should briefly discuss the justification for choosing that theory, approach, method, or technique rather than other options available, the assumptions and limitations implicit in those choices, and how those choices influence study conclusions and transferability. As appropriate, the rationale for several items might be discussed together.
